# Supplementary material for: New indenylidene-type metathesis catalysts bearing unsymmetrical N-heterocyclic ligands with mesityl and nitrobenzyl substituents
Source: PubMed Central journal article supplement (PMC4869738; doi:10.1007/s00706-016-1697-7), 2016-03-10
Supplement: 706_2016_1697_MOESM1_ESM.pdf [file 706_2016_1697_MOESM1_ESM.pdf]

## Supporting information

### New indenylidene-type metathesis catalysts bearing unsymmetrical N-heterocyclic ligands with mesityl and nitrobenzyl substituents

Marta Malinowska\*, Mariana Kozłowska, Agnieszka Hryniewicka,  
Stanisław Witkowski, Jacek W. Morzycki

*Institute of Chemistry, University of Białystok, Ciołkowskiego 1K, 15-245 Białystok, Poland*

\* e-mail: marta.terpilowska@gmail.com

#### Contents

|          |                                                                                                                                                                                                                                                         |           |
|----------|---------------------------------------------------------------------------------------------------------------------------------------------------------------------------------------------------------------------------------------------------------|-----------|
| <b>1</b> | <b>Copies of NMR spectra of new compounds</b>                                                                                                                                                                                                           | <b>2</b>  |
| 1.1      | <sup>1</sup> H NMR spectrum of <i>N</i> -mesityl- <i>N</i> -(3-nitrophenyl)-2(pentafluorophenyl)imidazoline ( <b>10</b> ) . . . . .                                                                                                                     | 2         |
| 1.2      | <sup>13</sup> C NMR spectrum of <i>N</i> -mesityl- <i>N</i> -(3-nitrophenyl)-2(pentafluorophenyl)imidazoline ( <b>10</b> ) . . . . .                                                                                                                    | 3         |
| 1.3      | <sup>1</sup> H NMR spectrum of <i>N</i> -(2-nitrobenzyl)- <i>N</i> -mesitylethylenediamine ( <b>12a</b> ) . . . . .                                                                                                                                     | 4         |
| 1.4      | <sup>13</sup> C NMR spectrum of <i>N</i> -(2-nitrobenzyl)- <i>N</i> -mesitylethylenediamine ( <b>12a</b> ) . . . . .                                                                                                                                    | 5         |
| 1.5      | <sup>1</sup> H NMR spectrum of <i>N</i> -(4-nitrobenzyl)- <i>N</i> -mesitylethylenediamine ( <b>12b</b> ) . . . . .                                                                                                                                     | 6         |
| 1.6      | <sup>13</sup> C NMR spectrum of <i>N</i> -(4-nitrobenzyl)- <i>N</i> -mesitylethylenediamine ( <b>12b</b> ) . . . . .                                                                                                                                    | 7         |
| 1.7      | <sup>1</sup> H NMR spectrum of <i>1</i> -Mesityl-3-(2-nitrobenzyl)imidazolium chloride ( <b>13a</b> ) . . . . .                                                                                                                                         | 8         |
| 1.8      | <sup>13</sup> C NMR spectrum of <i>1</i> -Mesityl-3-(2-nitrobenzyl)imidazolium chloride ( <b>13a</b> ) . . . . .                                                                                                                                        | 9         |
| 1.9      | <sup>1</sup> H NMR spectrum of <i>1</i> -Mesityl-3-(4-nitrobenzyl)imidazolium chloride ( <b>13b</b> ) . . . . .                                                                                                                                         | 10        |
| 1.10     | <sup>13</sup> C NMR spectrum of <i>1</i> -Mesityl-3-(4-nitrobenzyl)imidazolium chloride ( <b>13b</b> ) . . . . .                                                                                                                                        | 11        |
| 1.11     | <sup>1</sup> H NMR spectrum of [ <i>1</i> -Mesityl-3-(2-nitrobenzyl)-2-imidazolidinylidene]dichloro-(3-phenyl-1 <i>H</i> -inden-1-ylidene) (tricyclohexylphosphine)ruthenium(II) ( <b>14a</b> ) . . . . .                                               | 12        |
| 1.12     | <sup>13</sup> C NMR spectrum of [ <i>1</i> -Mesityl-3-(2-nitrobenzyl)-2-imidazolidinylidene]dichloro-(3-phenyl-1 <i>H</i> -inden-1-ylidene) (tricyclohexylphosphine)ruthenium(II) ( <b>14a</b> ) . . . . .                                              | 13        |
| 1.13     | HMBC correlations between <sup>13</sup> C and <sup>1</sup> H NMR spectrum of [ <i>1</i> -Mesityl-3-(2-nitrobenzyl)-2-imidazolidinylidene]dichloro-(3-phenyl-1 <i>H</i> -inden-1-ylidene) (tricyclohexylphosphine)ruthenium(II) ( <b>14a</b> ) . . . . . | 14        |
| 1.14     | <sup>1</sup> H NMR spectrum of [ <i>1</i> -Mesityl-3-(2-nitrobenzyl)-2-imidazolidinylidene]dichloro-(3-phenyl-1 <i>H</i> -inden-1-ylidene) (tricyclohexylphosphine)ruthenium(II) ( <b>14b</b> ) . . . . .                                               | 15        |
| 1.15     | <sup>13</sup> C NMR spectrum of [ <i>1</i> -Mesityl-3-(2-nitrobenzyl)-2-imidazolidinylidene]dichloro-(3-phenyl-1 <i>H</i> -inden-1-ylidene) (tricyclohexylphosphine)ruthenium(II) ( <b>14b</b> ) . . . . .                                              | 16        |
| <b>2</b> | <b>DFT calculations</b>                                                                                                                                                                                                                                 | <b>17</b> |
| <b>3</b> | <b>The final xyz coordinates of the examined indenylidene-type metathesis catalysts</b>                                                                                                                                                                 | <b>22</b> |

## 1. Copies of NMR spectra of new compounds

### 1.1. $^1\text{H}$ NMR spectrum of *N*-mesityl-*N*-(3-nitrophenyl)-2-(pentafluorophenyl)imidazoline (**10**)

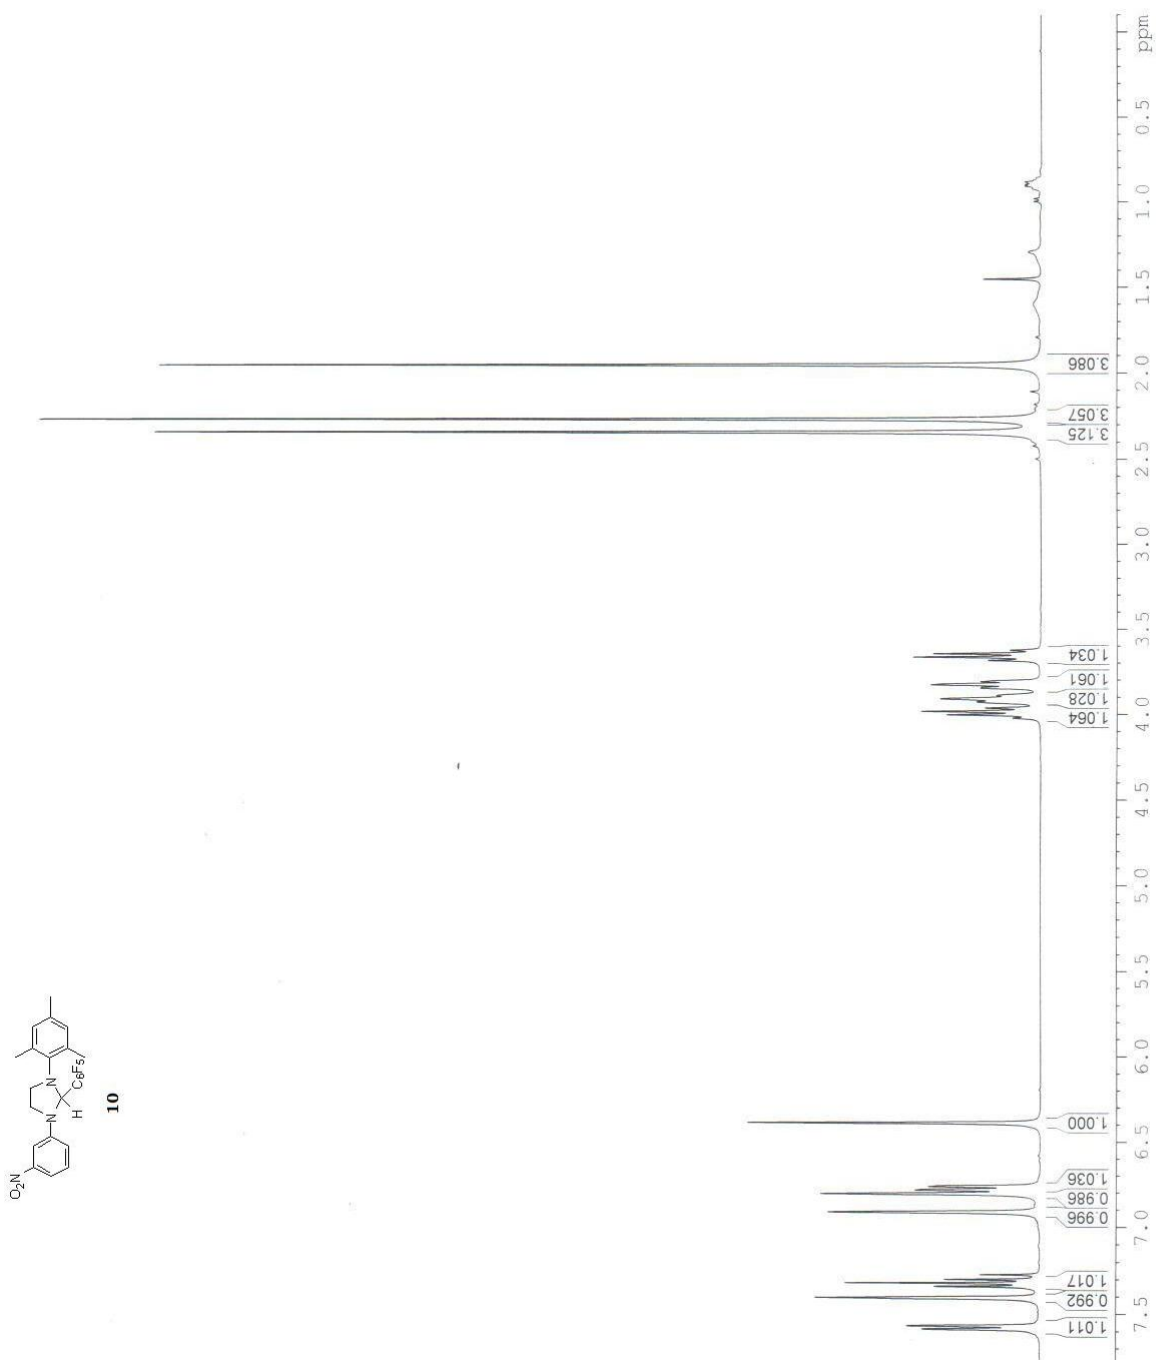

1.2.  $^{13}\text{C}$  NMR spectrum of *N*-mesityl-*N*-(3-nitrophenyl)-2-(pentafluorophenyl)imidazoline (**10**)

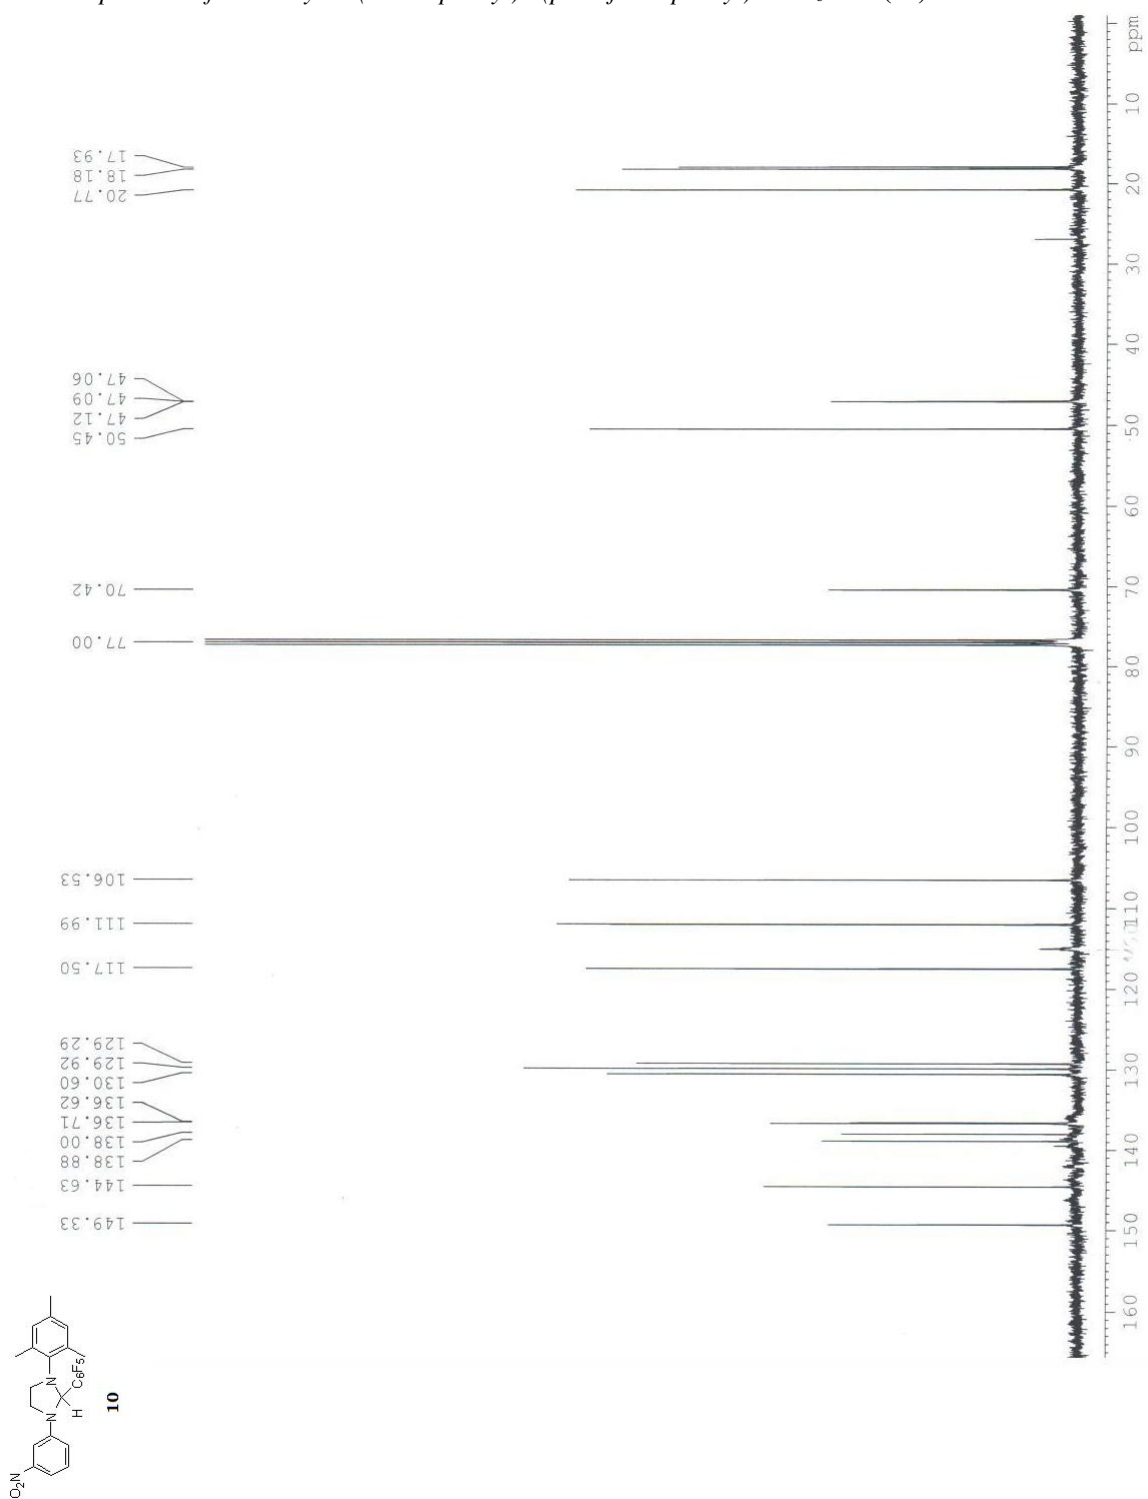

1.3.  $^1\text{H}$  NMR spectrum of *N*-(2-nitrobenzyl)-*N*-mesitylethylenediamine (**12a**)

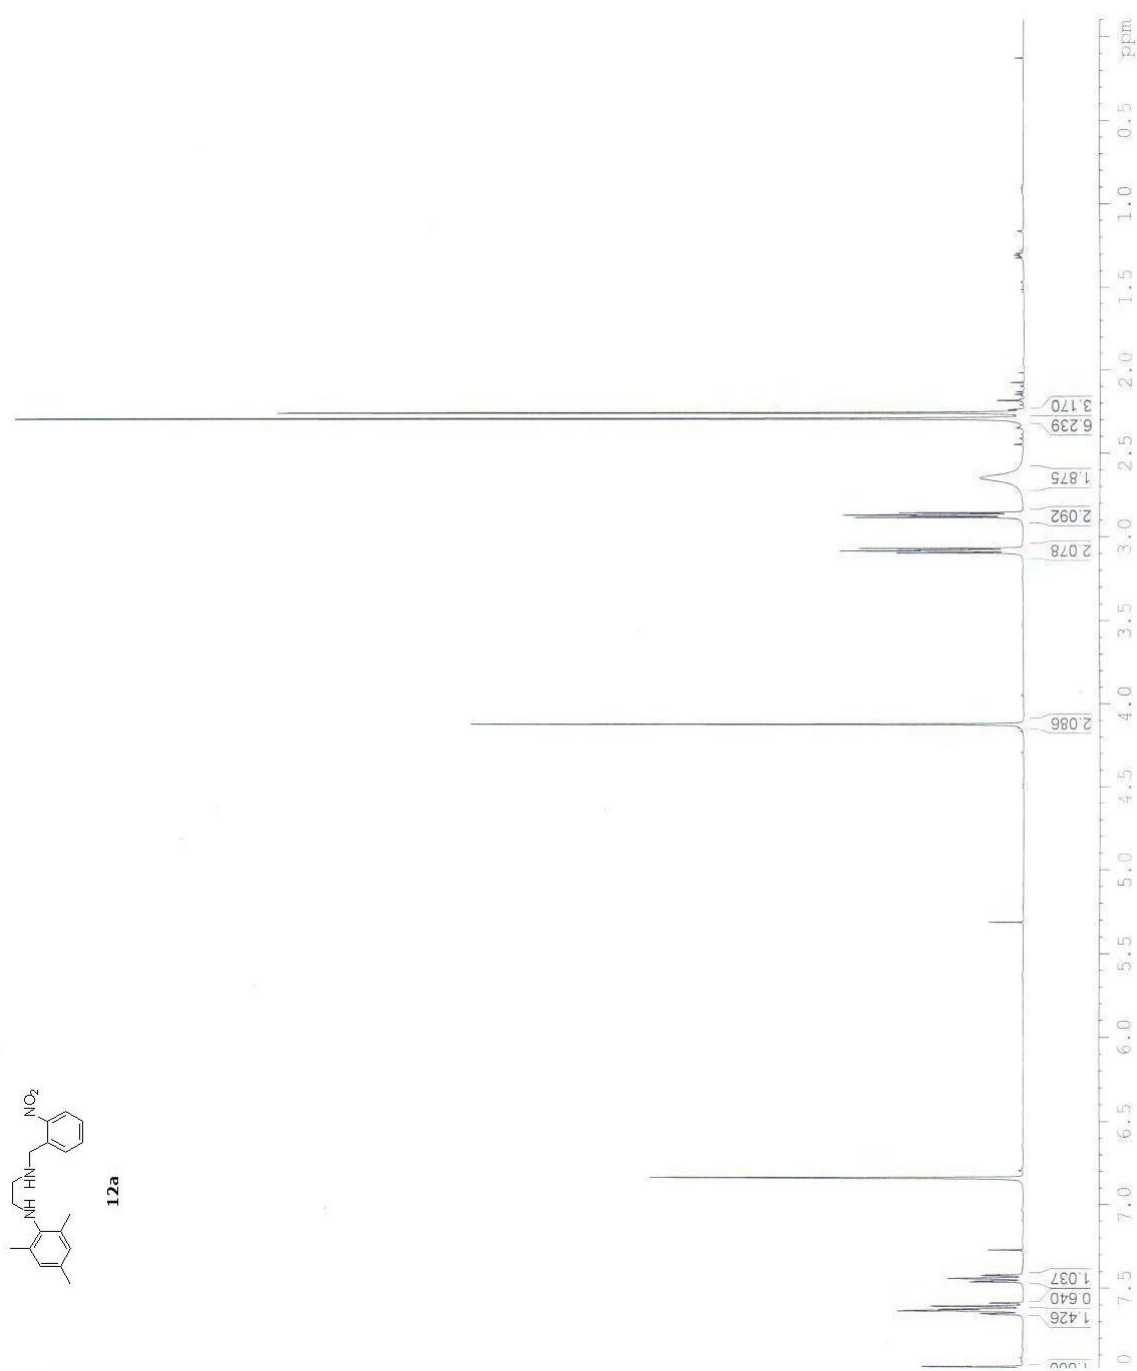

1.4.  $^{13}\text{C}$  NMR spectrum of *N*-(2-nitrobenzyl)-*N*-mesitylethylenediamine (**12a**)

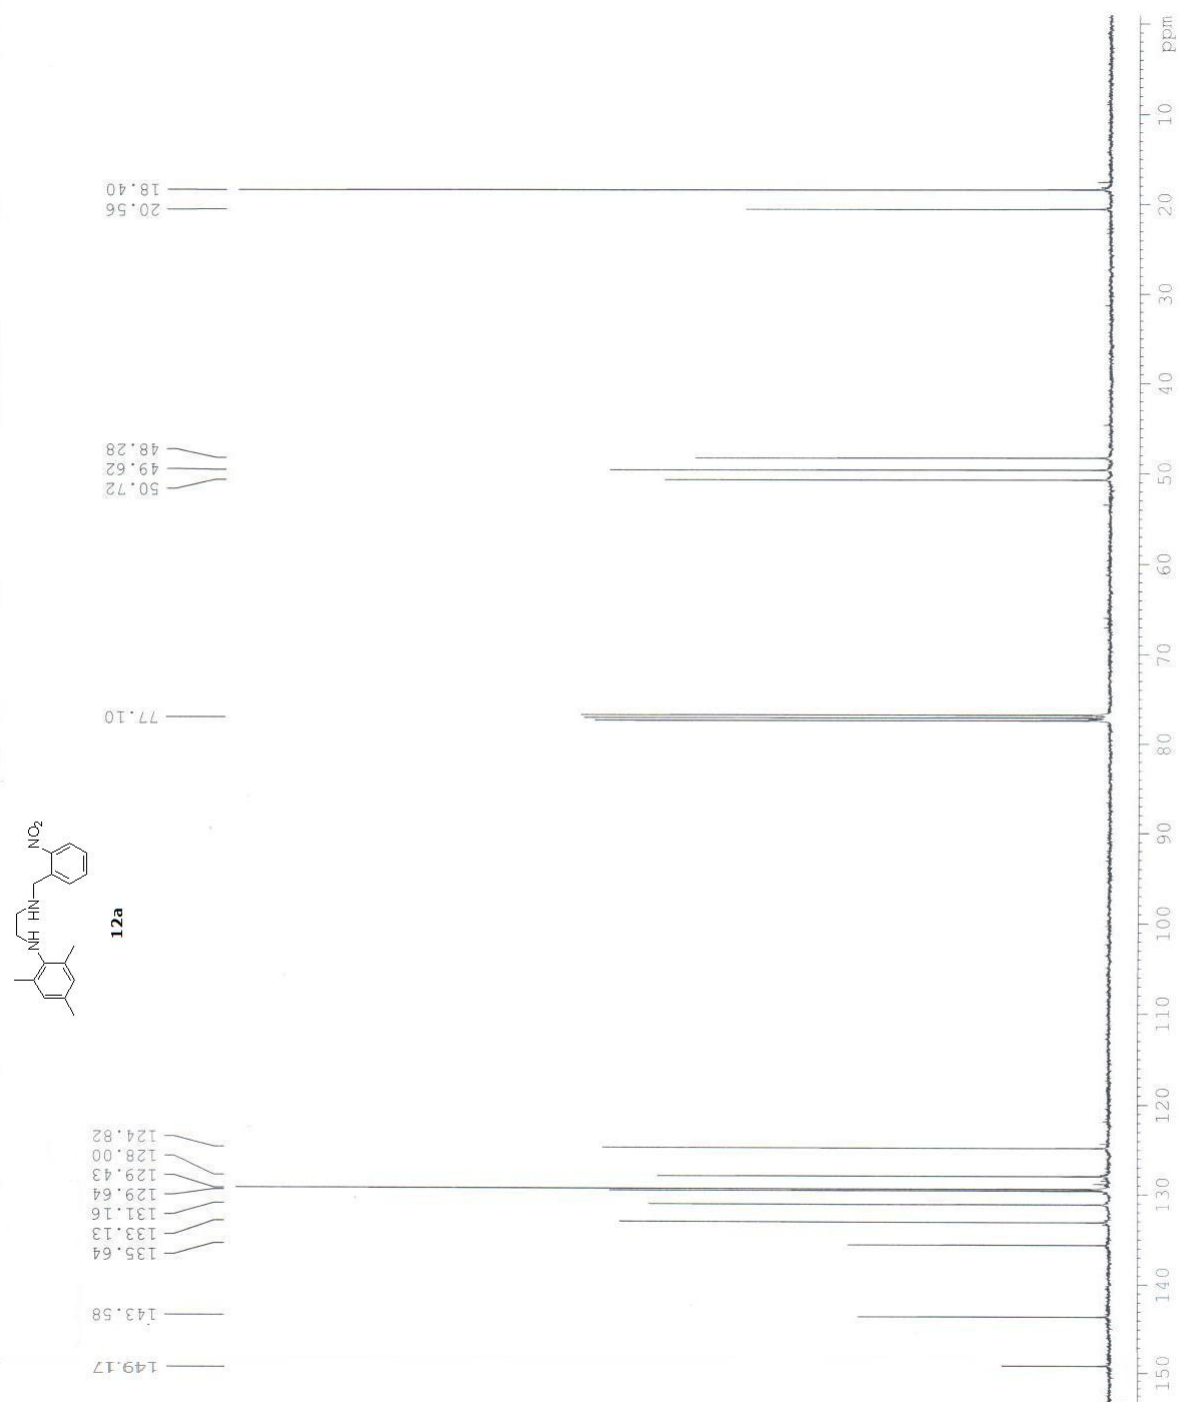

1.5.  $^1\text{H}$  NMR spectrum of *N*-(4-nitrobenzyl)-*N*-mesitylethylenediamine (**12b**)

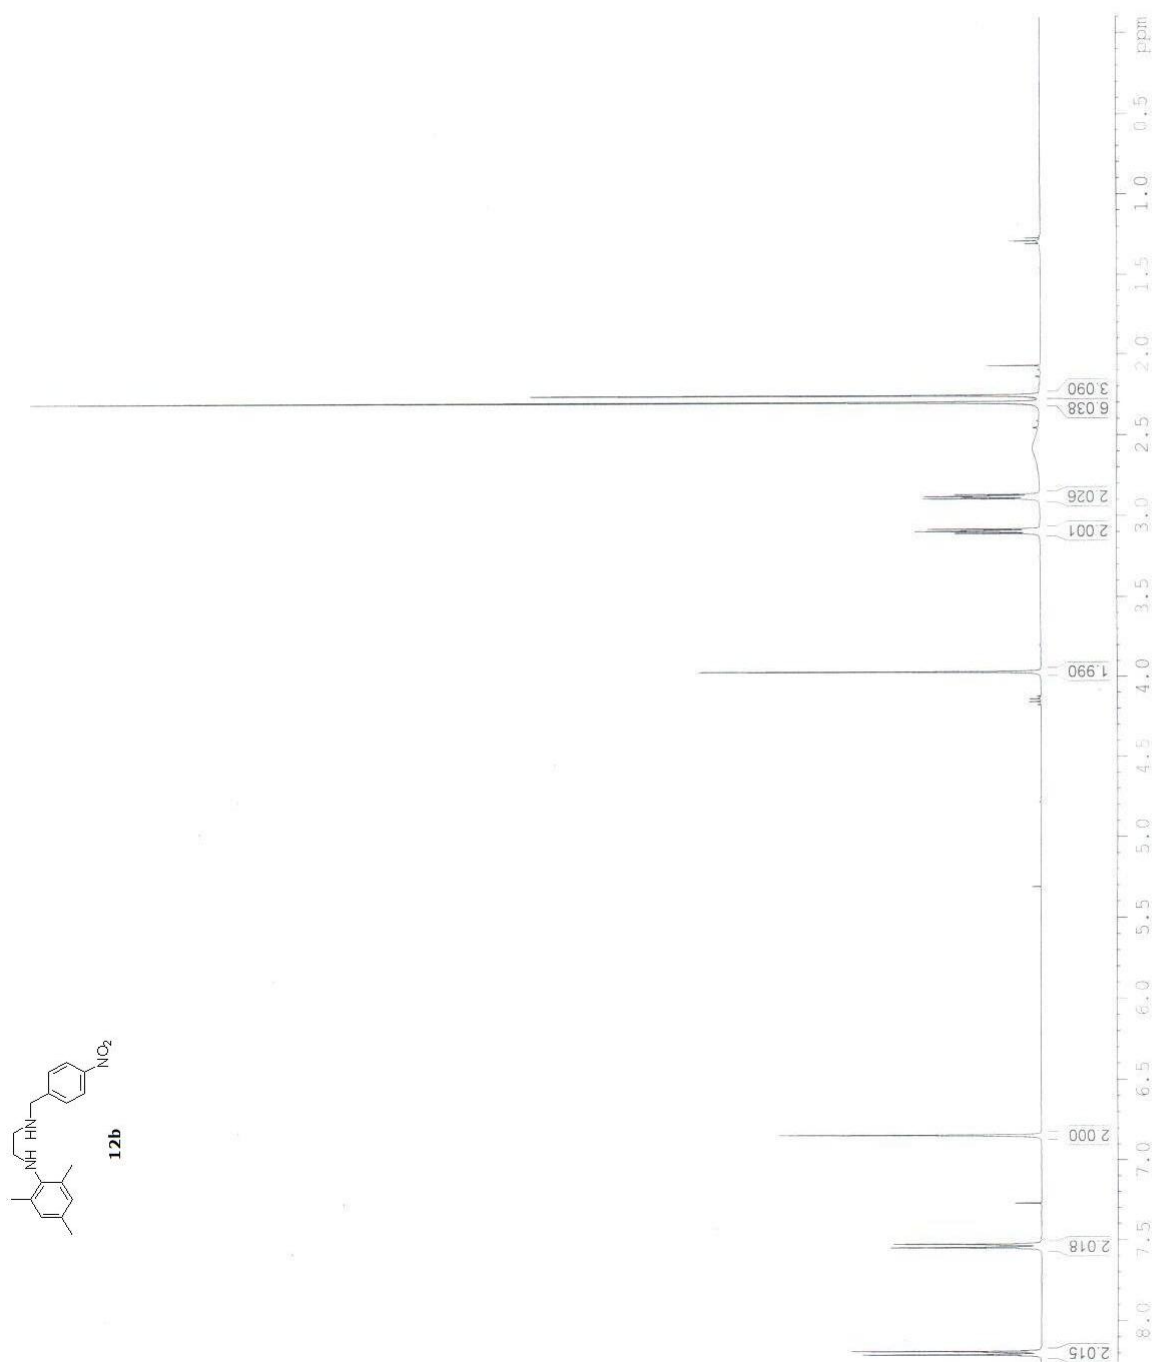

1.6.  $^{13}\text{C}$  NMR spectrum of *N*-(4-nitrobenzyl)-*N*-mesitylethylenediamine (**12b**)

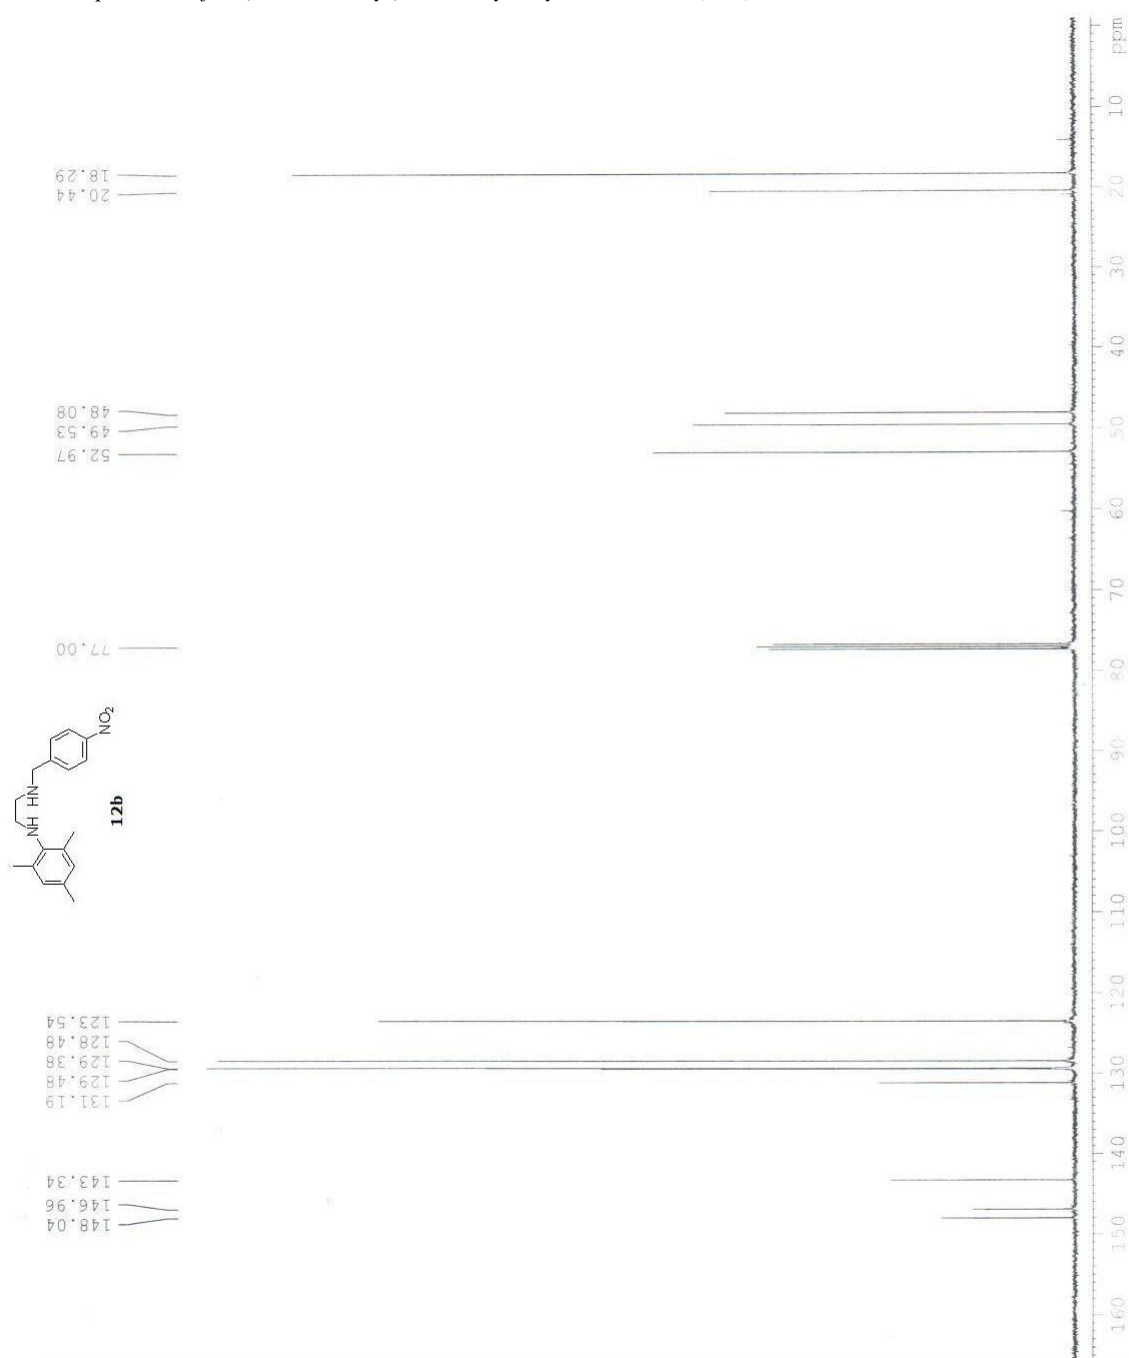

1.7.  $^1\text{H}$  NMR spectrum of 1-Mesityl-3-(2-nitrobenzyl)imidazolium chloride (**13a**)

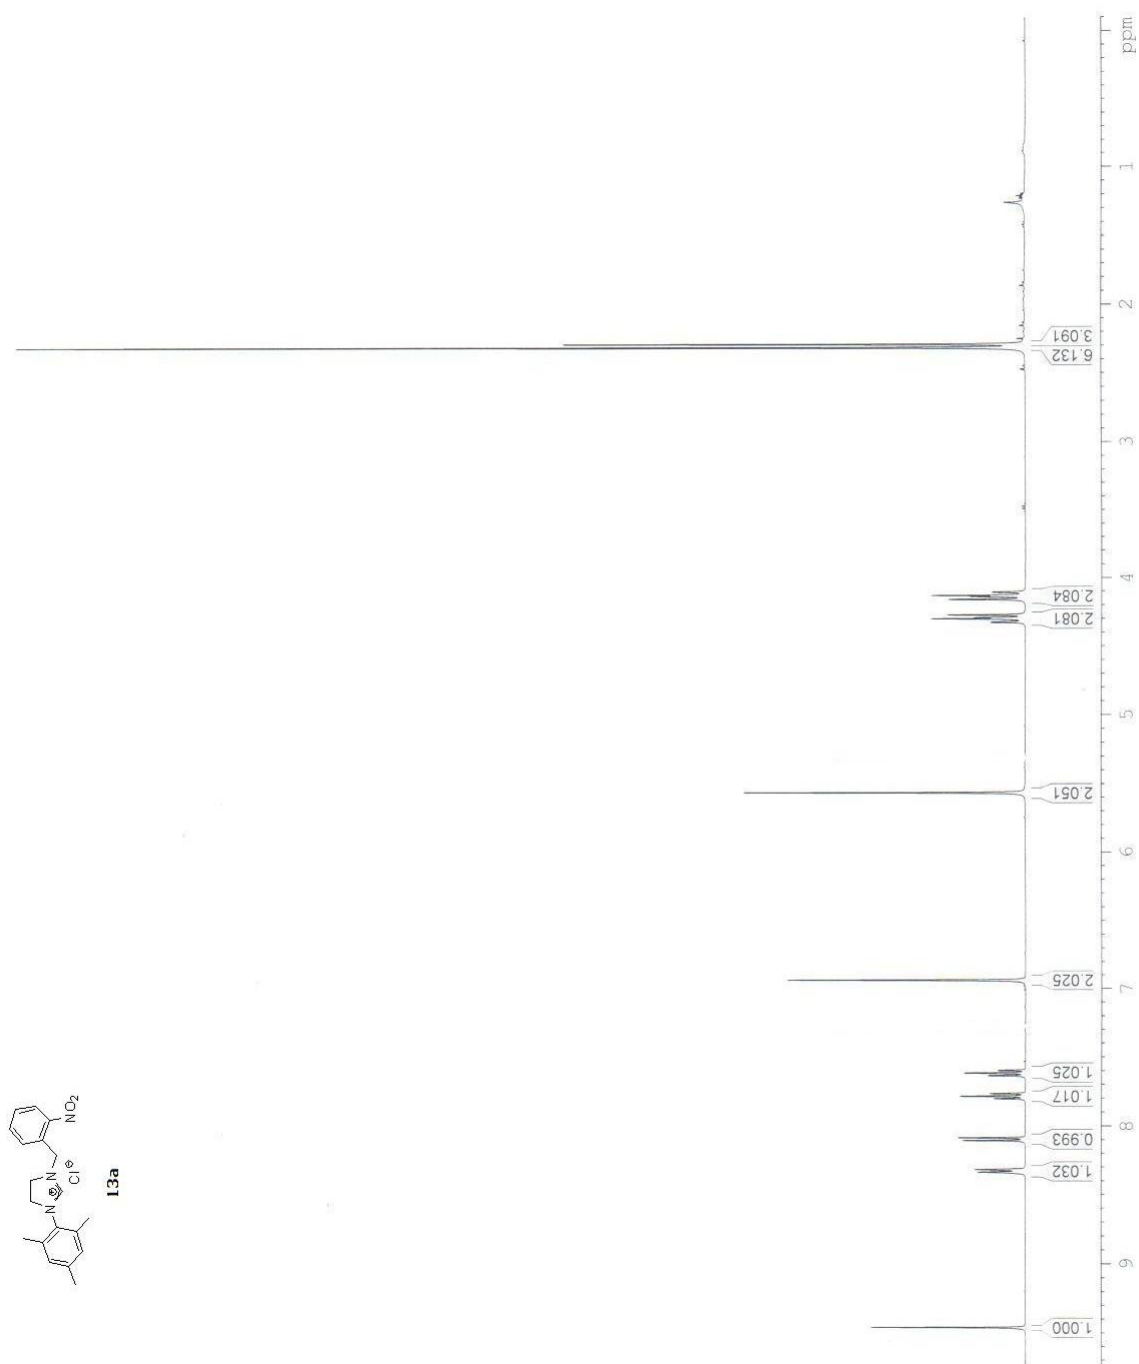



1.8.  $^{13}\text{C}$  NMR spectrum of 1-Mesityl-3-(2-nitrobenzyl)imidazolium chloride (**13a**)

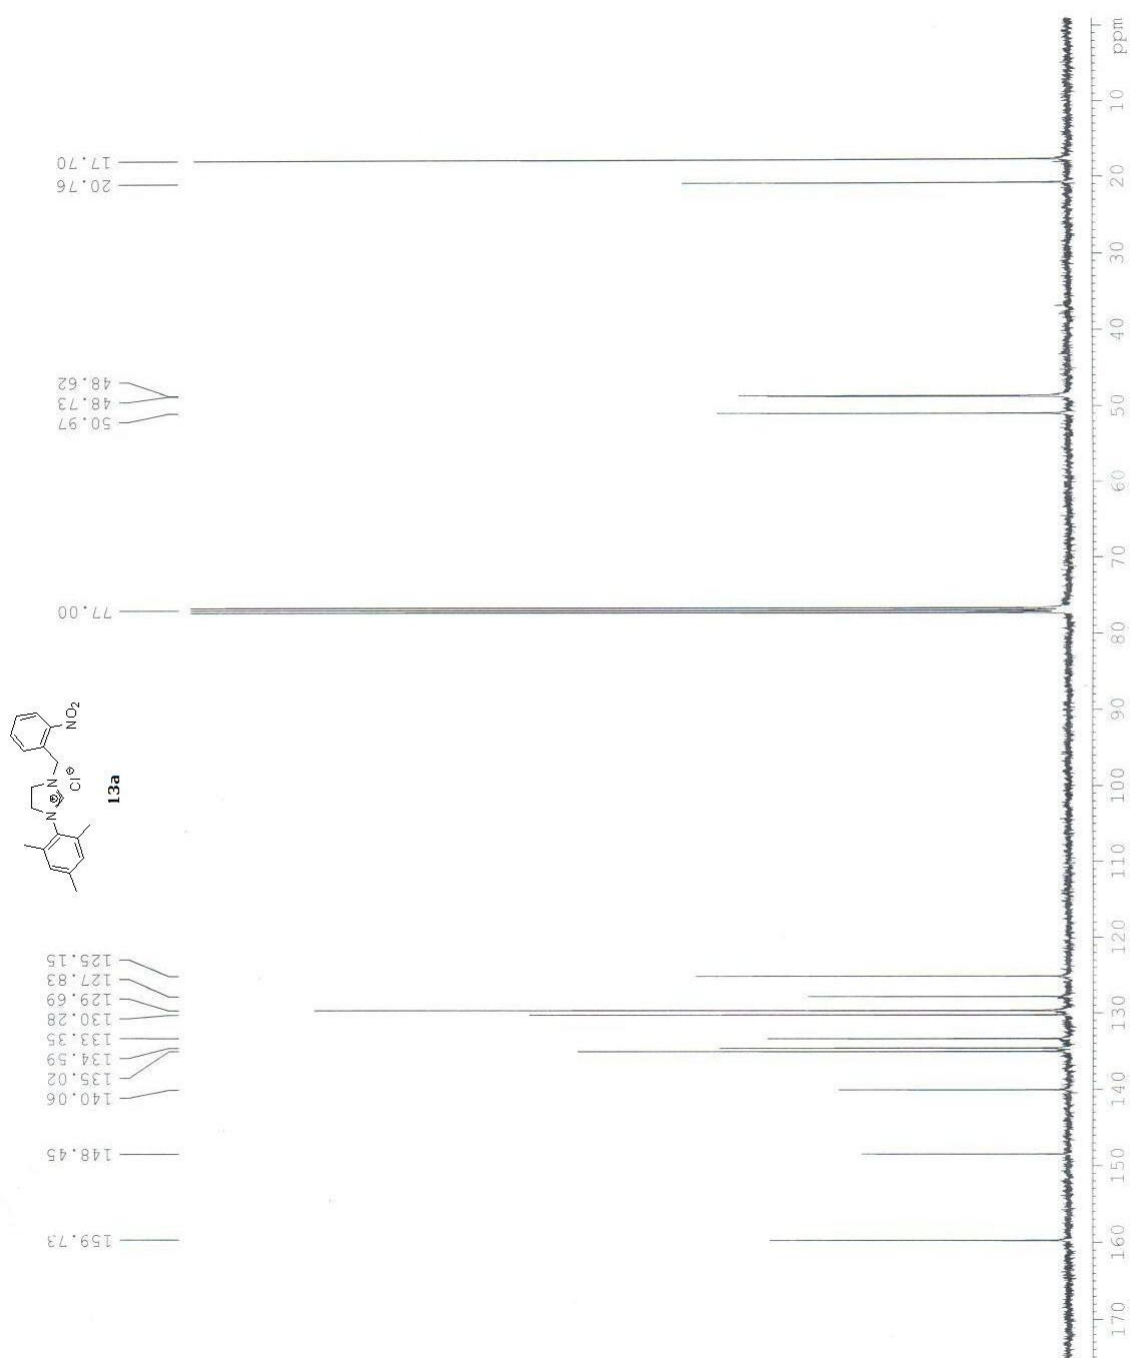

1.9.  $^1\text{H}$  NMR spectrum of 1-Mesityl-3-(4-nitrobenzyl)imidazolium chloride (**13b**)

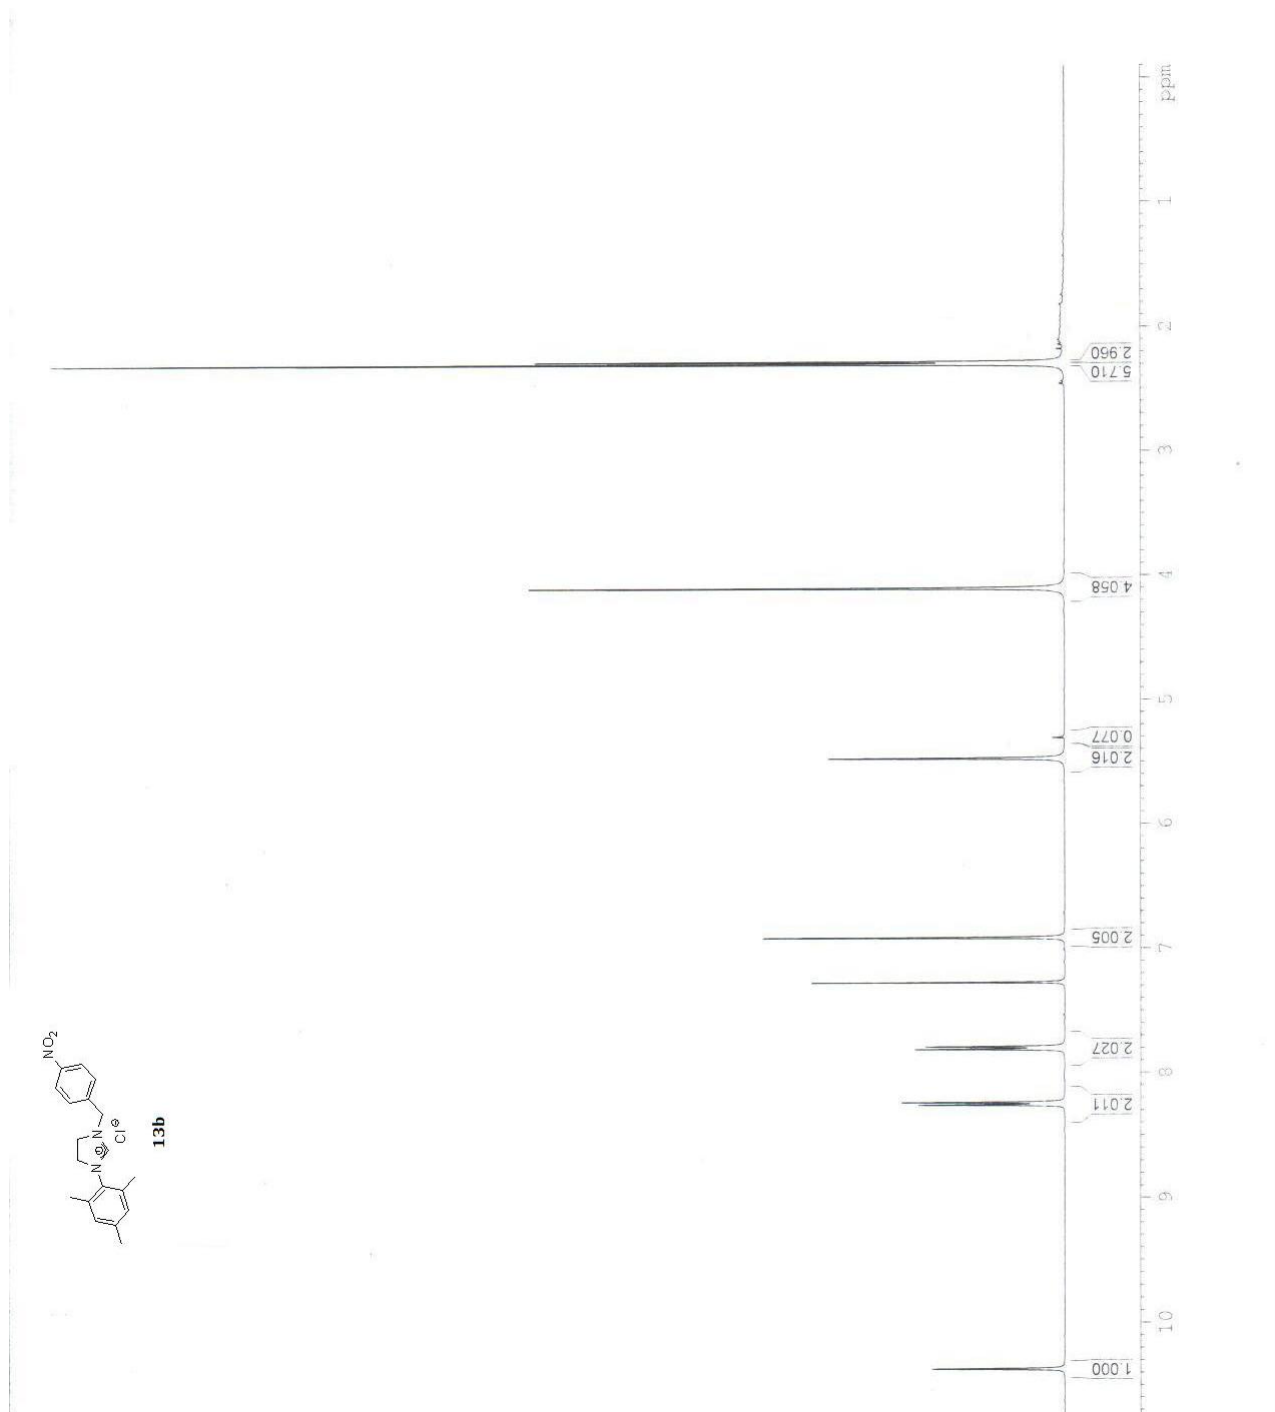

1.10.  $^{13}\text{C}$  NMR spectrum of 1-Mesityl-3-(4-nitrobenzyl)imidazolium chloride (**13b**)

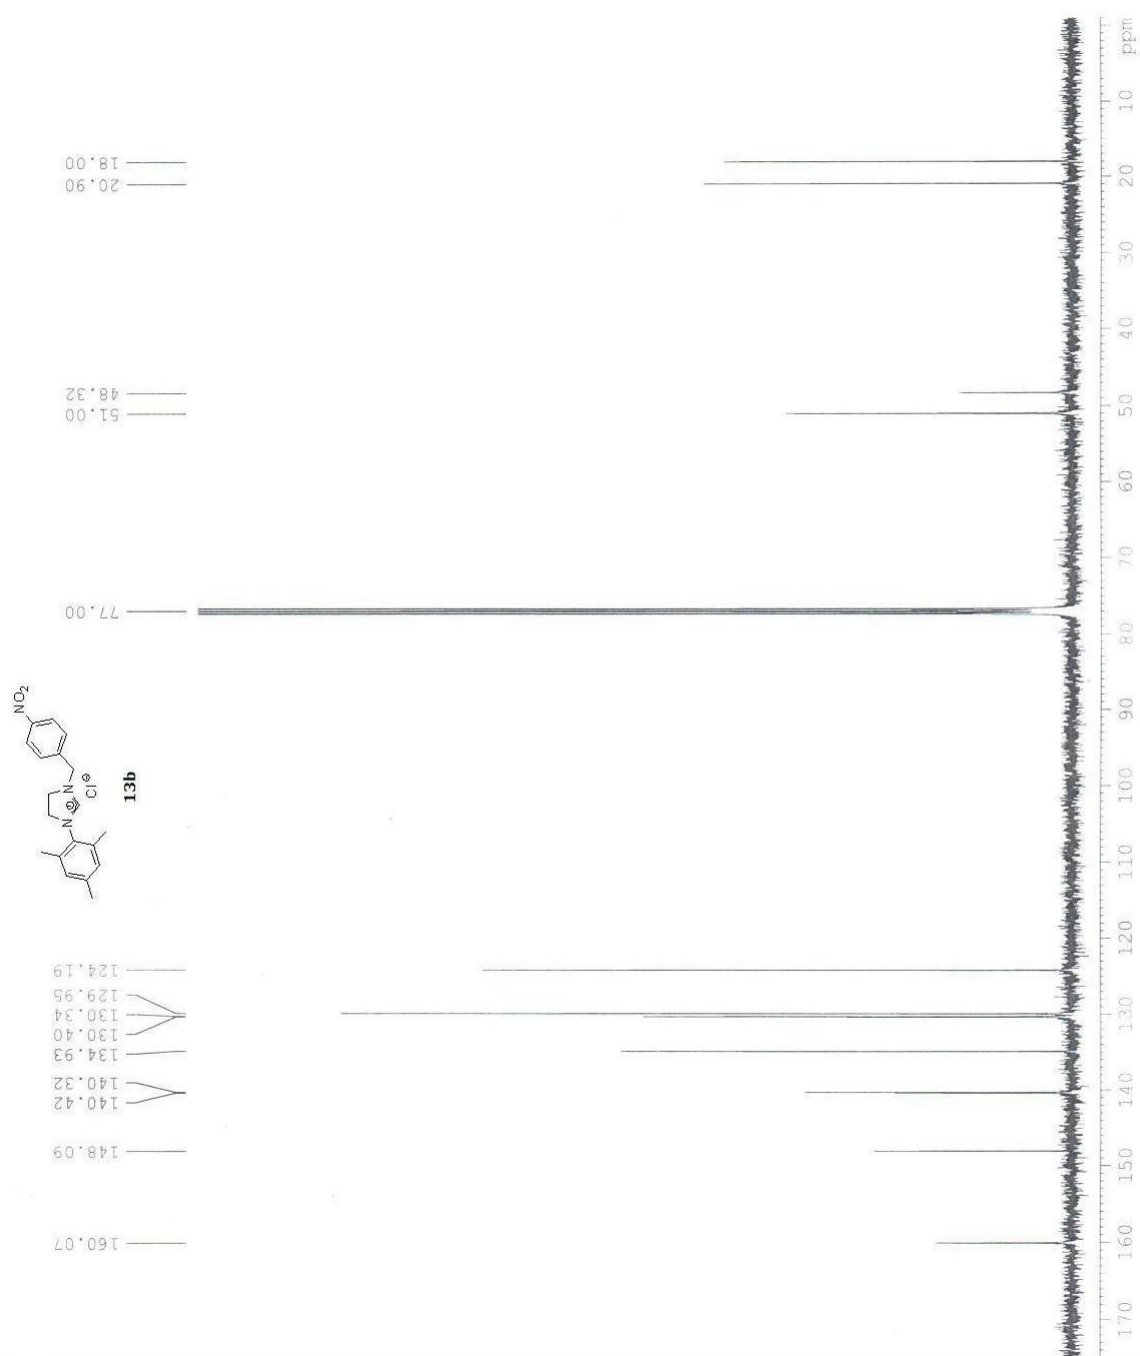

1.11.  $^1\text{H}$  NMR spectrum of [1-Mesityl-3-(2-nitrobenzyl)-2-imidazolidinylidene]dichloro-(3-phenyl-1H-inden-1-ylidene) (tricyclohexylphosphine)ruthenium(II) (**14a**)

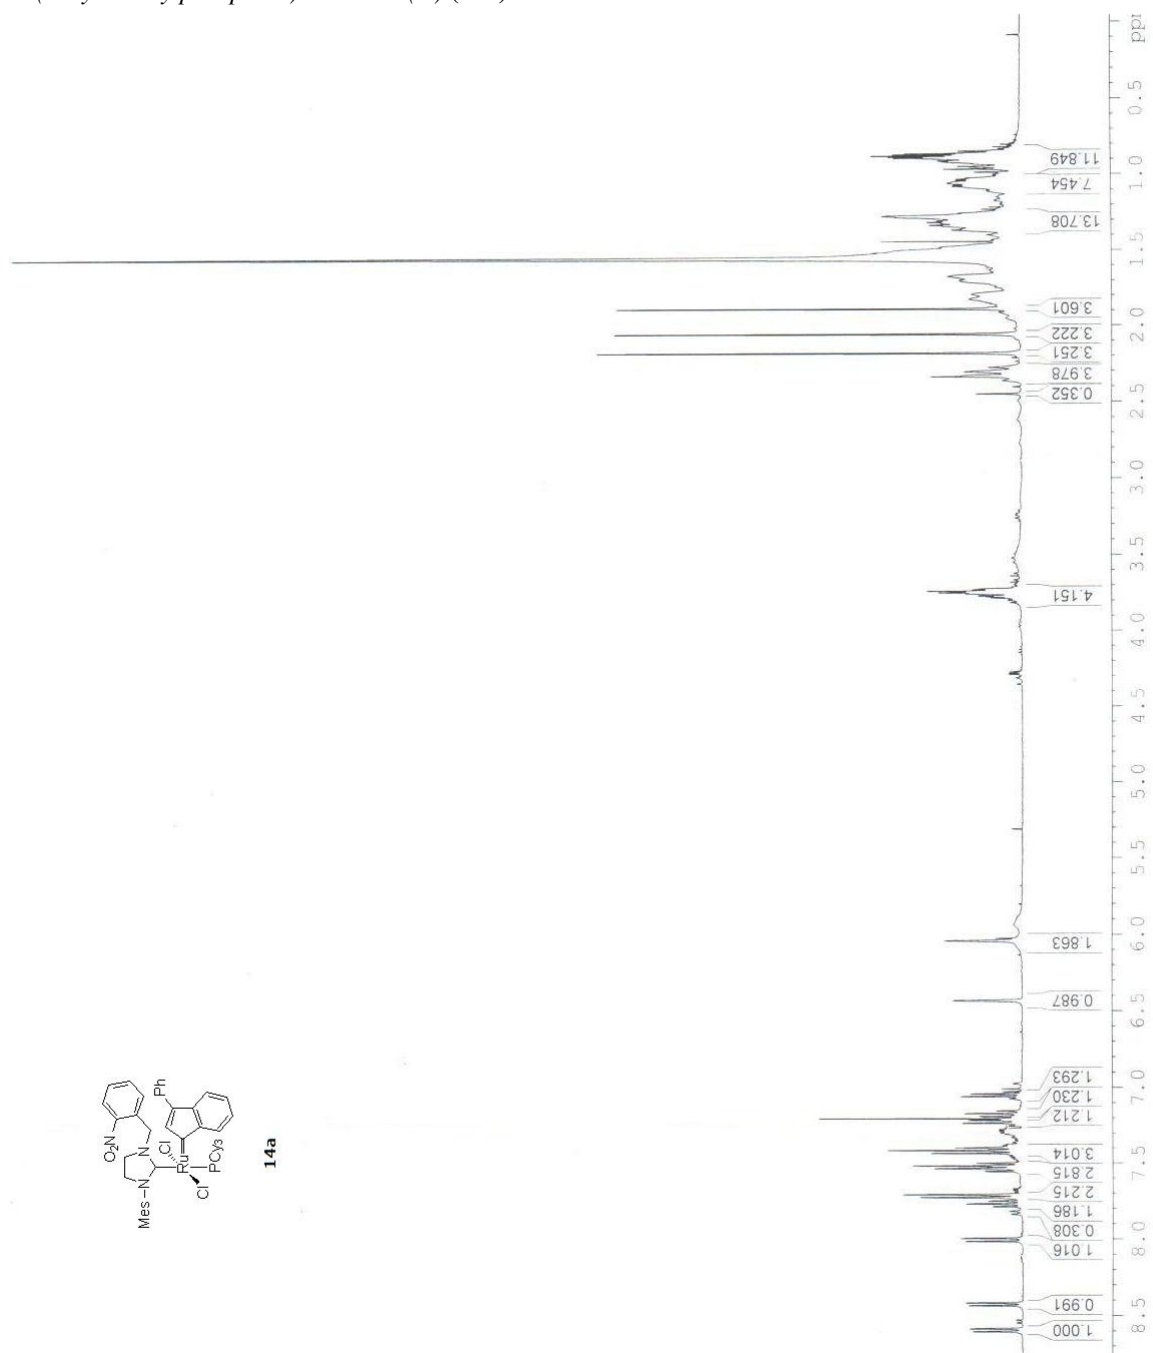

1.12.  $^{13}\text{C}$  NMR spectrum of [1-Mesityl-3-(2-nitrobenzyl)-2-imidazolidinylidene]dichloro-(3-phenyl-1H-inden-1-ylidene) (tricyclohexylphosphine)ruthenium(II) (**14a**)

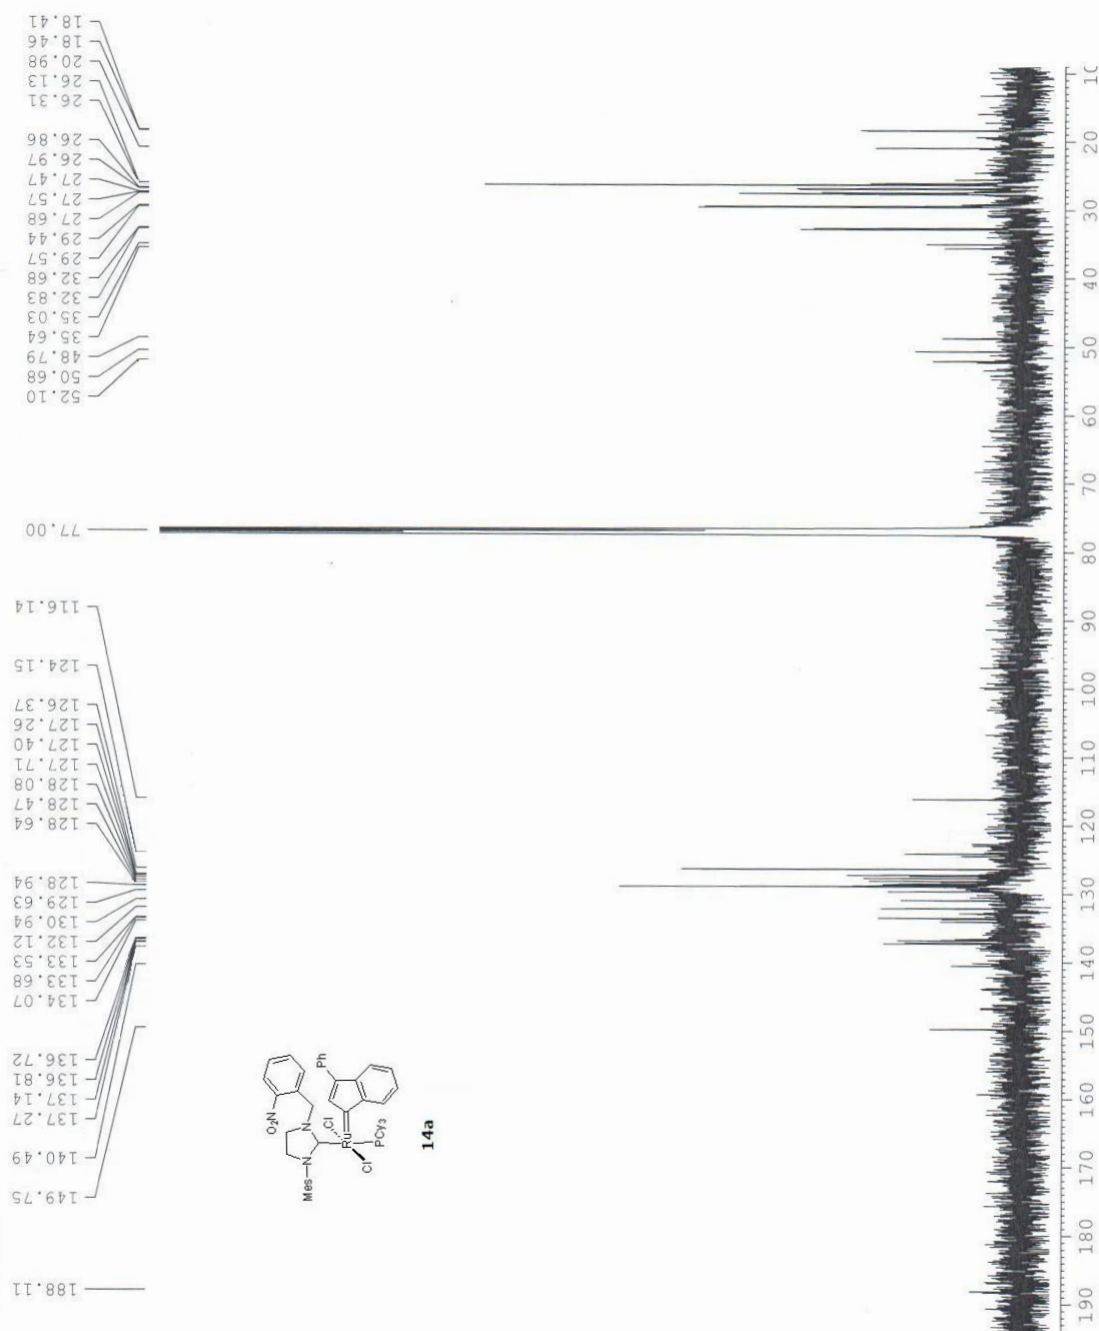

1.13. HMBC correlations between  $^{13}\text{C}$  and  $^1\text{H}$  NMR spectrum of [1-Mesityl-3-(2-nitrobenzyl)-2-imidazolidinylidene]dichloro-(3-phenyl-1H-inden-1-ylidene)(tricyclohexylphosphine)ruthenium(II) (**14a**)

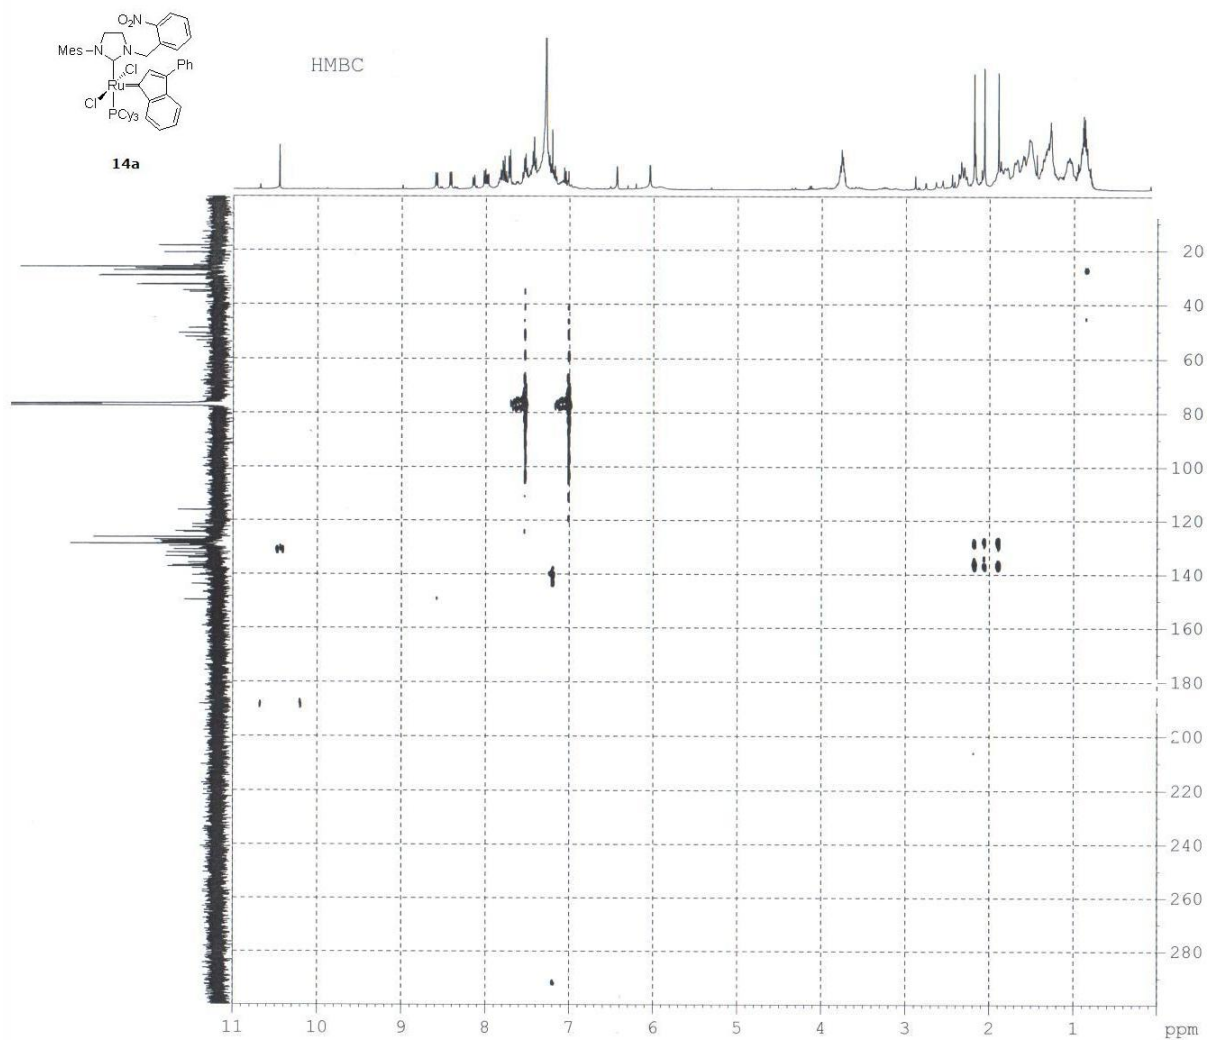

1.14.  $^1\text{H}$  NMR spectrum of [1-Mesityl-3-(2-nitrobenzyl)-2-imidazolidinylidene]dichloro-(3-phenyl-1H-inden-1-ylidene) (tricyclohexylphosphine)ruthenium(II) (**14b**)

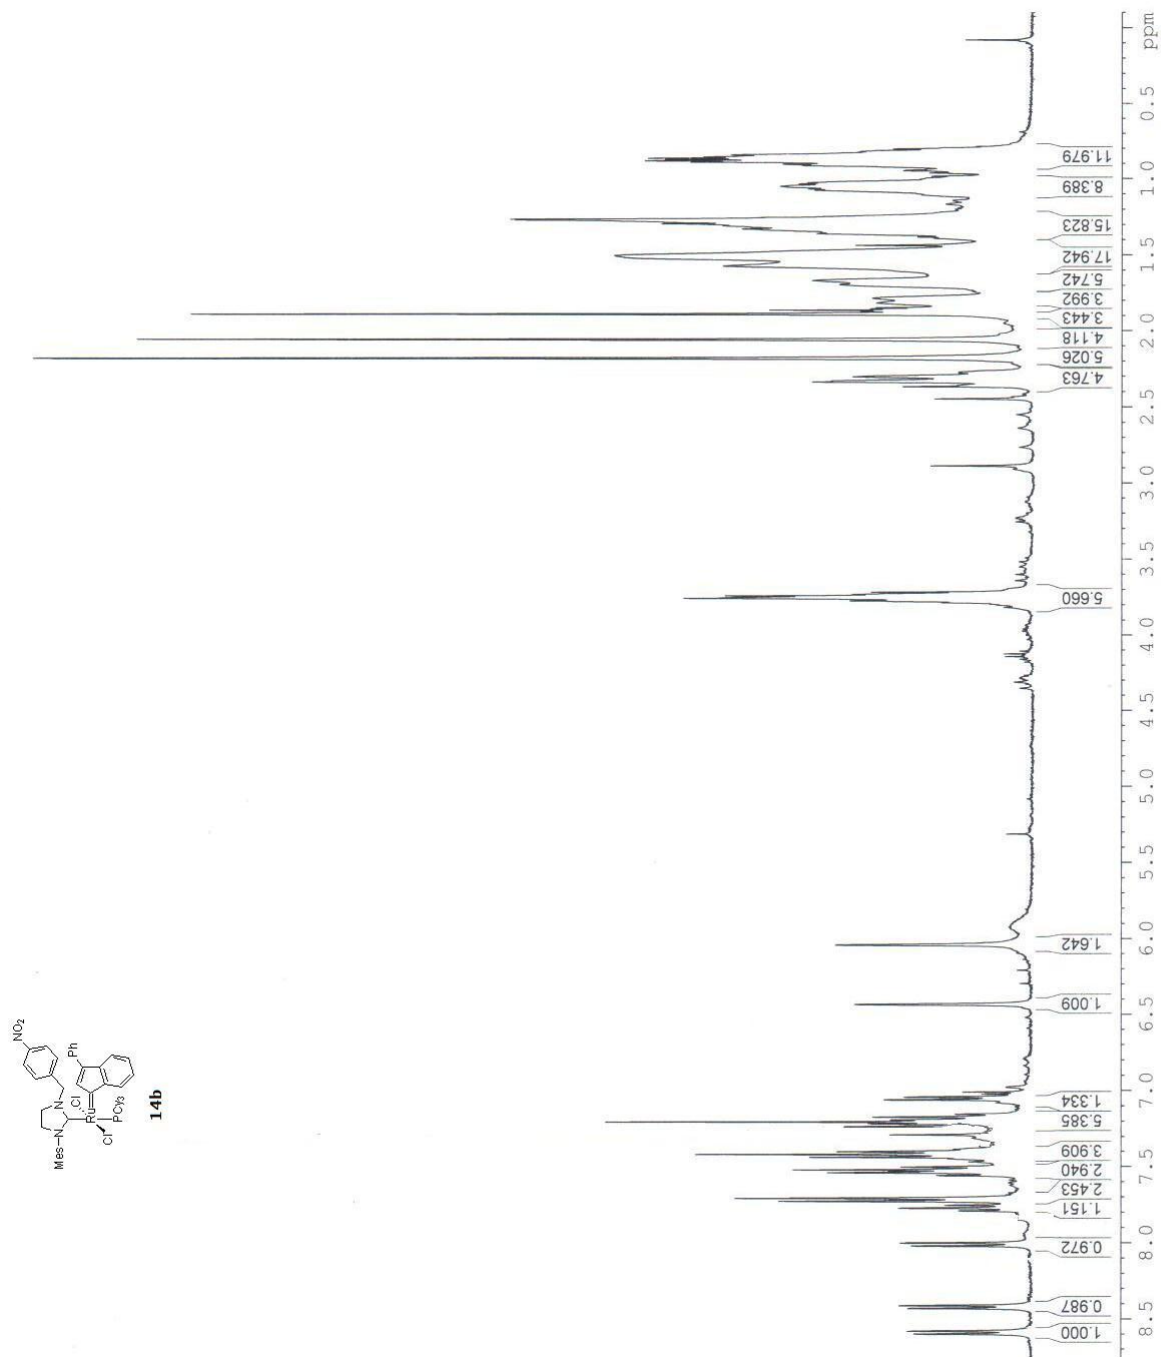

1.15.  $^{13}\text{C}$  NMR spectrum of [1-Mesityl-3-(2-nitrobenzyl)-2-imidazolidinylidene]dichloro-(3-phenyl-1H-inden-1-ylidene) (tricyclohexylphosphine)ruthenium(II) (**14b**)

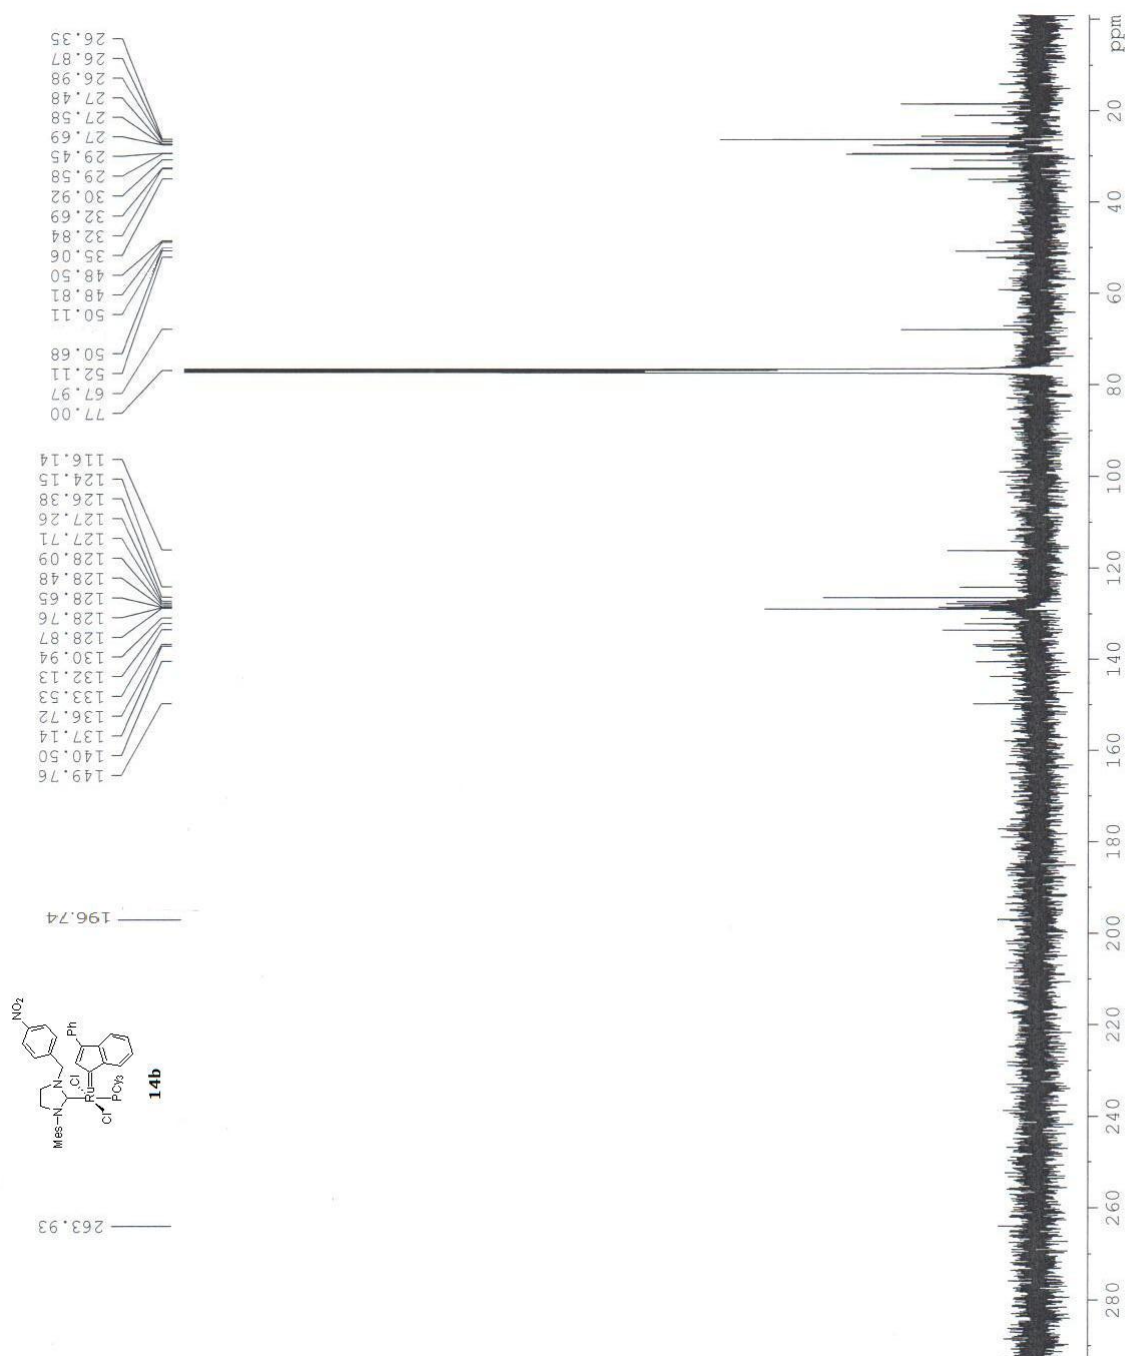



## 2. DFT calculations

To estimate the most stable structures of new indenylidene-type metathesis catalysts we performed geometry optimization of 13 conformers of each complex. Our main goal was to appoint additional intramolecular interactions which impact the stability of the examined ruthenium complexes. Therefore, we modified the structures of catalysts changing the possibility for hydrogen bonds formation,  $\pi$ - $\pi$  stacking interactions and specific  $\text{NO}_2 \cdots \text{Ru}$  interactions. The used computational setup for all performed calculations is included in the manuscript.

Due to the fact that some of the calculated conformers converged to the same local minima or had very similar values of absolute energy we have chosen only 6 conformers for further analysis. Fig. 1 and Fig. 2 contain the selected local minima after the geometry optimization of **14a,b**. The corresponding relative energy value for all local minima are also given in the figures. The relative energy value is the difference between the values of absolute energy for the particular local minimum and the global minimum, respectively. The higher is the value of relative energy the less stable is the structure of the complex. The most stable structure – the global minimum – is marked with the relative energy equal to 0.0. kJ/mol.

Two synthesized ruthenium complexes differs with the position of the nitro group in the phenyl ring bonded to the *N*-heterocyclic carbene ligand. The comparative analysis of their global minima indicated that complex **14b**, with the nitro group in *para*- position, is more stable than the complex **14a**, with the nitro group linked in *ortho*- position. The value of their absolute energy difference is 51.4 kJ/mol, which is caused with stronger C-H $\cdots\pi$  interactions and C-H $\cdots$ Cl hydrogen bonds in the case of **14b** catalyst. The detailed structural parameters of all C-H $\cdots$ Cl H-bonds formed in the examined structures are listed in Table 1 and Table 2. Even if C-H $\cdots$ Cl H-bonds belong to the weak H-bonds, their amount in the case of synthesized catalysts is enough to influence the structural stability of **14a,b**. The structure **14a(1)** has additional weak C-H $\cdots$ O H-bonds formed between the H atom from the mesityl group as the proton donor and the O atom from the nitro group as the proton acceptor. The structural parameters of the mentioned C-H $\cdots$ O H-bonds in **14a(1)** equal to 3.01 Å, 3.08 Å and 140.56°, 119.98° for the H $\cdots$ O distance and  $\angle$  CHO, respectively. Such H-bonds are too weak to stabilize efficiently the structure. Therefore, their absence does not influence the stability of the structure **14b(1)**, which is more stable than **14a(1)**.

Among other specific intramolecular interactions in the synthesized ruthenium catalysts are C-H $\cdots\pi$  H-bonds and  $\pi$ - $\pi$  stacking interactions. In the case of complex **14b** the nitro group is located far from mesityl group allowing it to locate in the preferable position for  $\pi$ - $\pi$  stacking interactions and C-H $\cdots\pi$  H-bonds formation with the indenylidene ligand. As the result, the energy gain of such interactions is higher in the case of **14b** than **14a**. Moreover, the preferable position of the indenylidene ligand is on the side of mesityl group (like in **14b(1)**), but not on the side of nitrobenzyl one (**14b(2)**), see Fig 2. Similar behavior can be also seen from the structures **14a(1)** and **14a(4)** in Fig 1. Such specific arrangement of indenylidene ligand causes better *Z*-selectivity of the synthesized complexes comparing with the commercial one (**5**). In all examined complexes no interactions between nitro group and the ruthenium atom were identified.

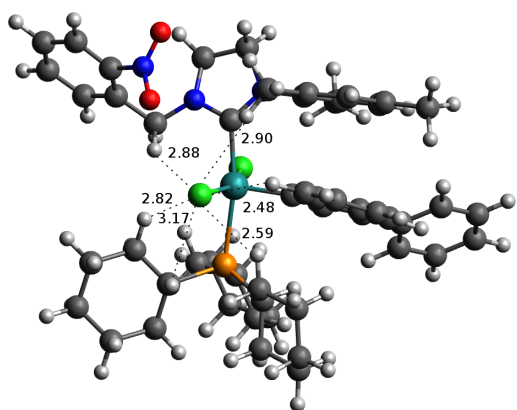

**14a(1):  $E_{rel} = 0.0$  kJ / mol**

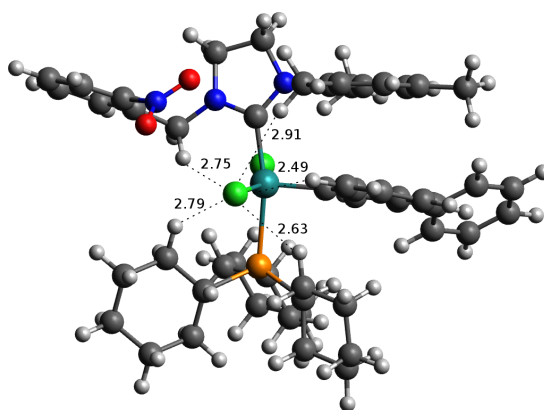

**14a(2):  $E_{rel} = 6.0$  kJ / mol**

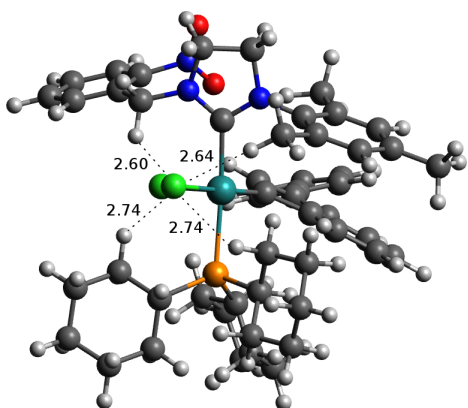

**14a(3):  $E_{rel} = 40.6$  kJ / mol**

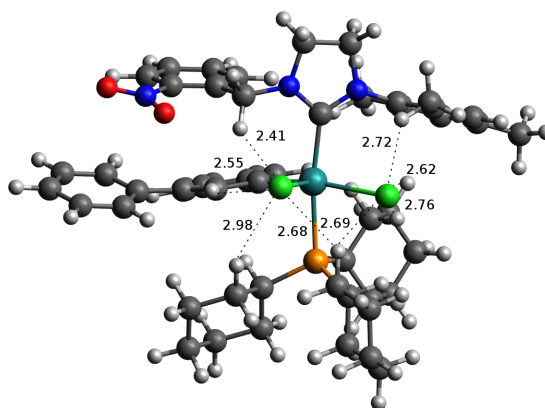

**14a(4):  $E_{rel} = 58.3$  kJ / mol**

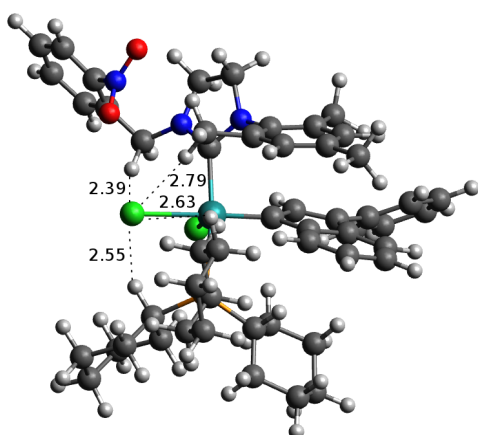

**14a(5):  $E_{rel} = 69.9$  kJ / mol**

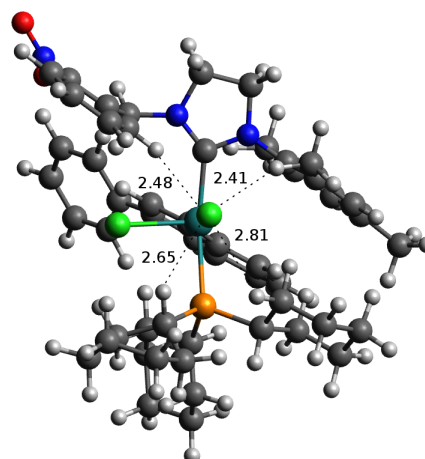

**14a(6):  $E_{rel} = 82.1$  kJ / mol**

Figure 1: Selected structures of the optimized local minima of **14a** complex with the corresponding relative energy value.

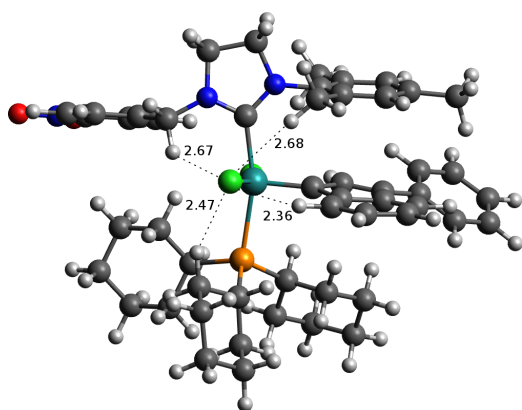

**14b(1):**  $E_{rel} = 0.0$  kJ / mol

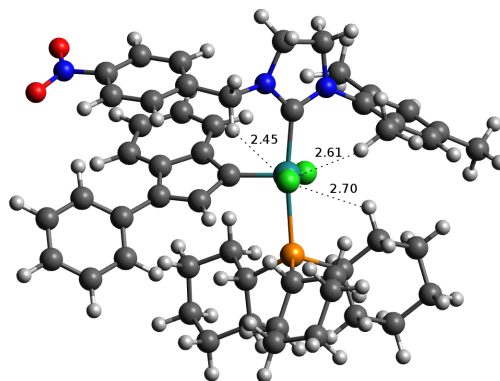

**14b(2):**  $E_{rel} = 17.7$  kJ / mol

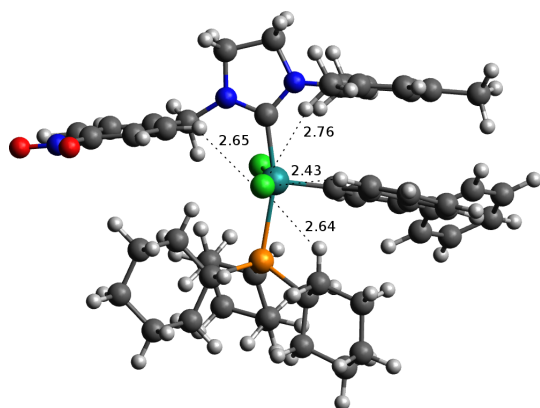

**14b(3):**  $E_{rel} = 22.3$  kJ / mol

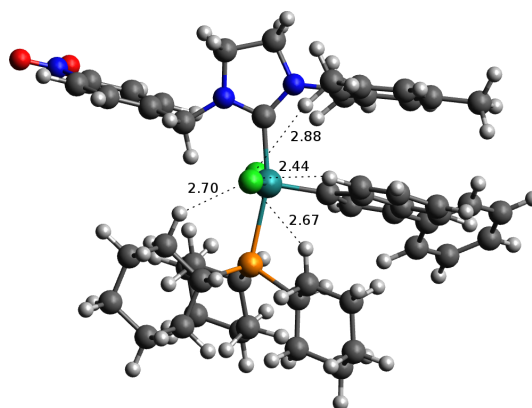

**14b(4):**  $E_{rel} = 28.1$  kJ / mol

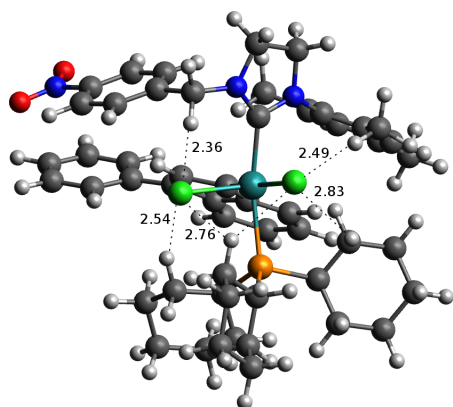

**14b(5):**  $E_{rel} = 78.4$  kJ / mol

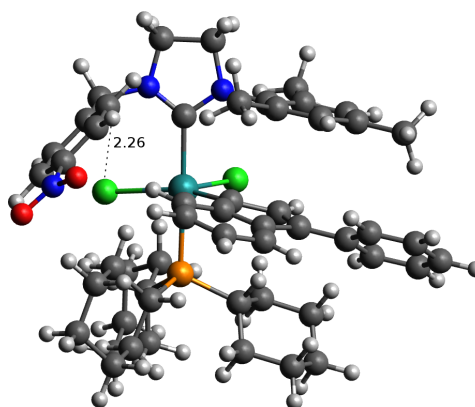

**14b(6):**  $E_{rel} = 106.2$  kJ / mol

Figure 2: Selected structures of optimized local minima of **14b** complex with the corresponding relative energy value.

Table 1: The structural parameters of C-H...Cl H-bonds in **14a** complexes

| Label         | $E_{rel}$ [ kJ/mol ] | H...Cl [ Å ] | $\angle$ CHCl [ ° ] |
|---------------|----------------------|--------------|---------------------|
| <b>14a(1)</b> | <b>0.0</b>           | 2.90         | 170.90              |
|               |                      | 2.48         | 137.43              |
|               |                      | 2.59         | 138.49              |
|               |                      | 2.82         | 134.79              |
|               |                      | 2.88         | 145.54              |
|               |                      | 2.97         | 113.70              |
|               |                      | 2.70         | 118.16              |
|               |                      | 2.62         | 122.37              |
|               |                      | 2.67         | 117.28              |
|               |                      | 2.62         | 171.60              |
| <b>14a(2)</b> | <b>6.0</b>           | 2.91         | 167.84              |
|               |                      | 2.49         | 139.25              |
|               |                      | 2.63         | 137.90              |
|               |                      | 2.79         | 138.90              |
|               |                      | 2.75         | 143.34              |
|               |                      | 3.04         | 111.32              |
|               |                      | 2.70         | 117.55              |
|               |                      | 2.66         | 117.57              |
|               |                      | 2.58         | 174.39              |
| <b>14a(3)</b> | <b>40.6</b>          | 2.64         | 176.30              |
|               |                      | 2.74         | 120.11              |
|               |                      | 2.74         | 134.62              |
|               |                      | 2.60         | 128.99              |
|               |                      | 2.62         | 111.68              |
|               |                      | 2.76         | 116.91              |
|               |                      | 2.59         | 154.41              |
| <b>14a(4)</b> | <b>58.3</b>          | 2.41         | 141.51              |
|               |                      | 2.55         | 116.21              |
|               |                      | 2.63         | 137.90              |
|               |                      | 2.98         | 151.95              |
|               |                      | 2.68         | 135.05              |
|               |                      | 2.72         | 113.27              |
|               |                      | 2.62         | 123.11              |
|               |                      | 2.76         | 112.02              |
| 2.69          | 123.83               |              |                     |
| <b>14a(5)</b> | <b>69.9</b>          | 2.79         | 174.78              |
|               |                      | 2.63         | 121.68              |
|               |                      | 2.55         | 133.59              |
|               |                      | 2.39         | 152.54              |
|               |                      | 2.98         | 132.86              |
| <b>14a(6)</b> | <b>82.1</b>          | 2.41         | 148.06              |
|               |                      | 2.81         | 110.24              |
|               |                      | 2.65         | 138.09              |
|               |                      | 2.48         | 163.45              |
|               |                      | 2.37         | 139.55              |
|               |                      | 2.56         | 140.21              |

Table 2: The structural parameters of C-H...Cl H-bonds in **14b** complexes

| Label         | $E_{rel}$ [ kJ/mol ] | H...Cl [ Å ] | $\angle$ CHCl [ ° ] |
|---------------|----------------------|--------------|---------------------|
| <b>14b(1)</b> | <b>0.0</b>           | 2.68         | 175.59              |
|               |                      | 2.36         | 142.76              |
|               |                      | 2.47         | 151.49              |
|               |                      | 2.67         | 127.67              |
|               |                      | 2.59         | 144.34              |
|               |                      | 2.70         | 165.01              |
|               |                      | 2.53         | 119.83              |
|               |                      | 2.74         | 134.16              |
|               |                      | 2.89         | 115.67              |
| <b>14b(2)</b> | <b>17.7</b>          | 2.93         | 126.40              |
|               |                      | 2.61         | 165.47              |
|               |                      | 2.70         | 120.17              |
|               |                      | 2.45         | 136.77              |
|               |                      | 2.57         | 121.09              |
|               |                      | 2.82         | 114.76              |
| <b>14b(3)</b> | <b>22.3</b>          | 2.95         | 110.14              |
|               |                      | 2.76         | 161.96              |
|               |                      | 2.43         | 139.78              |
|               |                      | 2.64         | 136.68              |
|               |                      | 2.65         | 134.65              |
|               |                      | 2.72         | 121.88              |
| <b>14b(4)</b> | <b>28.1</b>          | 2.57         | 118.76              |
|               |                      | 2.55         | 117.05              |
|               |                      | 2.88         | 165.83              |
|               |                      | 2.44         | 141.55              |
|               |                      | 2.67         | 143.34              |
|               |                      | 2.70         | 138.71              |
|               |                      | 2.64         | 145.70              |
| <b>14b(5)</b> | <b>78.4</b>          | 2.72         | 117.04              |
|               |                      | 2.58         | 123.43              |
|               |                      | 2.58         | 118.32              |
|               |                      | 2.51         | 176.58              |
|               |                      | 2.76         | 111.18              |
|               |                      | 2.54         | 152.55              |
| <b>14b(6)</b> | <b>106.2</b>         | 2.36         | 128.56              |
|               |                      | 2.49         | 169.76              |
|               |                      | 2.83         | 119.86              |
|               |                      | 2.68         | 140.50              |
|               |                      | 2.26         | 139.23              |
|               |                      | 2.86         | 114.33              |
| <b>14b(6)</b> | <b>106.2</b>         | 2.61         | 123.12              |
|               |                      | 2.89         | 123.91              |
|               |                      | 2.60         | 147.65              |

### 3. The final xyz coordinates of the examined indenylidene-type metathesis catalysts

#### 14a(1) – global minimum

125

Coordinates from ORCA-job

C 0.66424970393847 2.26817380788507 3.23953003980830  
N 1.89370261645935 2.73004739868184 2.97801344384945  
C 2.27588711459624 3.83649388579400 3.88210870385391  
C 0.92429928590116 4.22614095733525 4.48060721565197  
N 0.15707030961560 2.98655661916720 4.26878671983538  
C 2.88887543892701 2.08043895196817 2.18401525849845  
H 2.74420453485200 4.64241252643709 3.31773869206353  
H 2.97315476464641 3.47411225013635 4.64326441285647  
H 0.45165207213573 5.04499382017445 3.92668678540974  
H 0.99108148209031 4.48447580556700 5.53627932074401  
C -1.22838564081009 2.85824576373628 4.68175124990559  
Ru -0.58912922882720 1.12719407472610 2.07270289653130  
Cl -0.61238835868456 -0.78490849380331 3.64685890707175  
Cl -1.08054345810039 3.43750842899640 1.17547759007727  
P -2.54987623607571 0.11836474537451 0.81460902590865  
C -3.89931978645106 -0.50048884132307 2.00445081528608  
C -5.26568760661799 -0.83346217298885 1.38622934742886  
H -3.44327180735366 -1.42687059631867 2.37088300759162  
C -6.19299913962952 -1.46349913482220 2.43720464560896  
H -5.73222204481894 0.07970584628815 1.00658070313109  
H -5.15879907695949 -1.50586957221510 0.53499330755446  
C -6.35140459622293 -0.55500546148611 3.66147618716225  
H -7.16961924896736 -1.67660913886696 1.99048665692688  
H -5.77406072333043 -2.42678197517246 2.75352781770687  
C -4.98813103861956 -0.19958814594582 4.26559404011151  
H -6.86231959333733 0.36832044994430 3.35851779664672  
H -6.98757110303472 -1.03541101767780 4.41178343985819  
C -4.05463465551828 0.42489473496398 3.22099664271767  
H -5.11128263908239 0.48568467376031 5.11052992180927  
H -4.51583144589000 -1.10592502332559 4.66393904044932  
H -4.45401042674757 1.39435350639371 2.90820804537917  
H -3.07467475992011 0.59466626595796 3.66882689545903  
C -2.03633733509218 -1.41641291112500 -0.20870557121418  
C -3.23587088294614 1.43763852082562 -0.38948894599224  
C -4.16440654540569 2.42949770279505 0.32766916037080  
H -2.32006627691056 1.98907915971837 -0.61514852943934  
C -4.45765105983657 3.63724221266991 -0.57009027797182  
H -5.10801903894752 1.93931010802003 0.58686327804321  
H -3.69533058652730 2.77164017288145 1.24859045002132  
C -5.05404638428784 3.20463457135636 -1.91337924156107  
H -5.13805495015307 4.32360914420019 -0.05468744282502  
H -3.52240377026115 4.18370988354914 -0.73494279607597  
C -4.14330001778554 2.19208608384508 -2.61495036448250  
H -6.03718360515169 2.74609269501320 -1.74320177597886  
H -5.22002978210446 4.07442970829559 -2.55678197457929  
C -3.83895865343464 0.97932819697933 -1.72135284565464  
H -4.59347917254435 1.85417310276075 -3.55404422283588

H -3.19755672760040 2.68359065991176 -2.87832452430346  
H -4.76196478355552 0.41316862783386 -1.55066856293738  
H -3.14565678203007 0.31907521121254 -2.24651798222516  
C -3.10422874320089 -2.17355596462655 -1.01657506985338  
H -1.30979661799962 -0.98116565638053 -0.90598374009114  
C -2.42358125046091 -3.20625679726495 -1.92932718705729  
H -3.76221786605951 -2.70355428080671 -0.32043009520446  
H -3.73353985044478 -1.51442265872264 -1.60838286295970  
C -1.58385066521504 -4.20527863705087 -1.12375943457394  
H -3.18010764897947 -3.73430742971899 -2.51927934248037  
H -1.77849039261689 -2.67816727115479 -2.64340687893861  
C -0.60000219032136 -3.48767809632968 -0.19378056437037  
H -2.25800596010002 -4.82878409669001 -0.52195102038909  
H -1.05055289266579 -4.88238914661662 -1.79924866124668  
C -1.30532556237810 -2.43958596454261 0.67234057974531  
H -0.08456265348439 -4.20837118941026 0.44780314405912  
H 0.17731529504858 -2.99320230935305 -0.78715284403172  
H -2.04028291100787 -2.93822188004444 1.31729676656111  
H -0.60222023190193 -1.95744912813795 1.33993237512498  
C 0.55736320245185 0.59154863238496 0.70809332684899  
C 0.57676432317291 1.21042567839189 -0.62343839462763  
C 1.44744033014138 0.56308804525389 -1.44563893492150  
C 2.04269855569022 -0.57158127776073 -0.69502568268772  
C 1.52161835706308 -0.54307953562153 0.62256665773126  
C 2.89181199834194 -1.58750465727740 -1.09925501327448  
C 1.76909671690884 0.94913116519242 -2.81921814220352  
H 0.03150533127144 2.10939259923159 -0.85943823177509  
C 3.07741343658545 0.84552569217541 -3.31837150138716  
C 3.37805847701573 1.26350543384340 -4.61058695745809  
C 2.37884540060223 1.78150506965825 -5.43212038570045  
C 1.07429333258027 1.88633862517142 -4.94962871554325  
C 0.77263650101758 1.47649829208915 -3.65721032361812  
H 3.86260959745333 0.46793400209913 -2.67681765355872  
H 4.39591620370977 1.18671677283453 -4.97652222621140  
H 2.61416479635156 2.10054919723082 -6.44078395907436  
H 0.29079804640112 2.28383046137276 -5.58463419603831  
H -0.24364365963500 1.54522985714419 -3.28705941230414  
C 3.26874635656681 -2.56306014988396 -0.16255963507295  
H 3.25373703844409 -1.64241593471817 -2.11805537203294  
H 3.93858730708884 -3.36121676022738 -0.46343662005156  
C 2.78351184435966 -2.51911281897020 1.13829259910596  
C 1.89463602541836 -1.51059786529360 1.53826396753302  
H 3.08237613383885 -3.27754679683039 1.85269928863736  
H 1.48766530491384 -1.49771293277254 2.53903641797686  
C 3.21274967859930 2.60142301358390 0.92720037435703  
C 4.21688671911140 1.96362129958769 0.19641470469393  
C 4.89824276724172 0.85603343379612 0.69662271458723  
C 4.56290223493973 0.38099907433454 1.96687584440317  
C 3.55769064440512 0.97240864448811 2.72675393352246  
C 2.51219407310208 3.81365899628293 0.37512416707312  
H 4.46337386607285 2.34230957444398 -0.78984202945270  
C 5.95144379729660 0.15818580675113 -0.12418276924637

H 5.07714261741750 -0.48752386515004 2.36391337427836  
C 3.16330057028815 0.41629398230253 4.06973455183493  
H 2.61926298498966 3.85305141155523 -0.71057038061407  
H 1.44995812406553 3.81518019819210 0.62130007236900  
H 2.94929307365297 4.73346259324802 0.78237497077643  
H 5.56520633650872 -0.79051818026287 -0.50935544285669  
H 6.26365586879953 0.76752435147958 -0.97525533174398  
H 6.83748165316798 -0.06878138909863 0.47459360219111  
H 3.26931651611524 1.15322627564639 4.87106222053725  
H 2.11777641681189 0.09750733931208 4.07897926848308  
H 3.78241587865279 -0.44557356969231 4.32315843009501  
C -1.42665066847629 3.27056487898106 6.12112669128031  
C -2.47720446108592 4.12151815965203 6.46800392398280  
C -2.66804889979177 4.54182431984137 7.78200064618923  
C -1.78112030254724 4.14564155570580 8.77948811713467  
C -0.70788061627965 3.32069450202341 8.45817302458724  
C -0.56669846339313 2.88050239292110 7.14999578402464  
H -3.14565501978575 4.46383011586069 5.68633461655834  
H -3.49964520976903 5.19362484098843 8.02266528431865  
H 0.01079150496433 3.01068926277824 9.20593432338683  
H -1.88373006561586 3.45412308834551 4.03705626313542  
H -1.49208905968514 1.80141349904749 4.57141987222783  
N 0.56380977058979 1.96754240812979 6.86992277722523  
H -1.91445879316759 4.48301711693250 9.79998921290743  
O 1.69019270417880 2.39115482082962 7.11370589782477  
O 0.29511458907129 0.86053196920971 6.44574882209013

**14a(2)**

125

Coordinates from ORCA-job

C -0.50855796004971 2.78470219139453 3.51576176199970  
N 0.82644686401262 2.90544380693867 3.56386348996295  
C 1.25273831241908 4.03518424779790 4.41806619772859  
C -0.07150838769132 4.76245337281445 4.69211948042818  
N -1.05055742978313 3.76826508434313 4.24828254776991  
C 1.78656526285935 1.94333051920222 3.11871357713665  
H 1.97810891555062 4.65460190711625 3.88919621519575  
H 1.71338314060045 3.65673400587861 5.33351927924966  
H -0.17250508594617 5.67769241418032 4.09836013073231  
H -0.21332676027496 4.99576405328368 5.74732752633306  
C -2.47917835166844 3.99010358894587 4.30368329301373  
Ru -1.73785731732848 1.65657910973033 2.31458515788424  
Cl -2.46823104121886 0.30207007347844 4.27185392885962  
Cl -1.53045112244074 3.70158675302576 0.85852424892904  
P -3.62499128548608 0.71307141893016 0.89897928610068  
C -5.29076100465006 0.67142497429490 1.81871358202524  
C -6.54930999272214 0.48863552973484 0.95766209901768  
H -5.16558997188303 -0.21702882125839 2.44788342464275  
C -7.78868062400555 0.31579875769634 1.84817768188726  
H -6.69283913040568 1.36932783004611 0.32589679059513  
H -6.44663946540735 -0.36540188483176 0.28897317604847



C -7.95626206270899 1.49901374498834 2.80815683418304  
H -8.68080913053931 0.20006804215115 1.22394989617321  
H -7.68704616954272 -0.60986521703157 2.42926855555125  
C -6.69181926578855 1.71430158855759 3.64735662024912  
H -8.16278451399018 2.40597941753156 2.22495401480846  
H -8.82180861491179 1.33968854532580 3.45876101087655  
C -5.44525057017049 1.86947955697128 2.76812382903610  
H -6.80473062164856 2.59343722625991 4.29028219508172  
H -6.54454902703103 0.85553867132216 4.31350113439007  
H -5.51323279449220 2.79718470633369 2.19017695080992  
H -4.56417640160040 1.93358200063011 3.40680365370882  
C -3.29703662119152 -1.10429956649609 0.39953891929495  
C -3.73844727615182 1.75610602556332 -0.70032876478441  
C -4.52922728714138 3.05509122103020 -0.47942835057794  
H -2.69280577722491 2.05376179336239 -0.80538547409233  
C -4.32839315218794 4.00968739066011 -1.66244768720882  
H -5.59527733062228 2.83285706127986 -0.37576297573322  
H -4.19280085697494 3.53945935242519 0.43647310213244  
C -4.71912404974511 3.34732789461265 -2.98774296840851  
H -4.91248753137996 4.92206320028472 -1.50557590519378  
H -3.27469857413298 4.30809017688625 -1.69010206261025  
C -3.96168651683543 2.03134553456307 -3.19014085882263  
H -5.79848533114419 3.14388369553122 -2.98758239932063  
H -4.52774194047321 4.02539552542921 -3.82594153670282  
C -4.15246810023394 1.07015704511214 -2.00575425904103  
H -4.28274841251448 1.54335533560201 -4.11676709921762  
H -2.89126577232533 2.24702240233365 -3.30112881064322  
H -5.20067109900170 0.75443050314489 -1.96033440791825  
H -3.54997162320674 0.17590174987695 -2.17589517419391  
C -4.35166369008799 -1.85015961812428 -0.43559542193582  
H -2.37933394813654 -1.01109334891092 -0.19289109392180  
C -3.78048524618847 -3.19870130419606 -0.90473200208742  
H -5.22792187252294 -2.04336259976795 0.19243824844078  
H -4.69542427422286 -1.27674608887023 -1.29276567491859  
C -3.35240958671602 -4.07121277489669 0.28121218672520  
H -4.52364852160040 -3.72345240753637 -1.51472876270649  
H -2.91493485891371 -3.01113655099172 -1.55271518541291  
C -2.40413388217621 -3.31450174801356 1.21847778568371  
H -4.24788129304265 -4.37015931310752 0.84160556469525  
H -2.88475362462362 -4.99445232215463 -0.07589359262359  
C -2.98663528873086 -1.95971987126336 1.63712196535039  
H -2.18783794997776 -3.91266313716225 2.10849795022734  
H -1.44341375804161 -3.14525646673833 0.71882517176684  
H -3.91417879170463 -2.11944325548504 2.20079441501440  
H -2.31278244135413 -1.44775429936409 2.31213539273632  
C -0.50990299818535 0.59439493648982 1.40699757619680  
C -0.08528225303208 0.85108436998036 0.02441770915478  
C 0.76487848302214 -0.12035271313906 -0.40859509876552  
C 0.91894280911160 -1.12321587903508 0.67643294005653  
C 0.16707647220596 -0.67776206314652 1.79150451540318  
C 1.57338324381474 -2.34294480913133 0.70663769216163  
C 1.44671706375714 -0.13879132742008 -1.70248719019577

H -0.35424930813273 1.74516180678177 -0.51326207091643  
C 2.76822521490196 -0.59772678577100 -1.82335934577557  
C 3.42393529793412 -0.55698877274883 -3.04930268354814  
C 2.77063374555244 -0.06948030497932 -4.17928301369788  
C 1.45646059819649 0.38570051260075 -4.07385745703062  
C 0.80191909018669 0.35344130494031 -2.84922461337455  
H 3.28961442336208 -0.95354636323430 -0.94498689332161  
H 4.44837356845454 -0.90373580803968 -3.12189205517395  
H 3.28091583780943 -0.04396202118860 -5.13549954702214  
H 0.94083082437479 0.76243960093663 -4.94992087222985  
H -0.22312593088216 0.69572493251274 -2.77039904928200  
C 1.51851385693140 -3.10861295824801 1.88215497549364  
H 2.10722780781467 -2.71389953618777 -0.15957901948158  
H 2.02878585059130 -4.06441516787369 1.92050195136483  
C 0.80807128471924 -2.65745983353393 2.98775326071279  
C 0.11646867110116 -1.43854582916611 2.94600285361800  
H 0.77186366385647 -3.25819739770635 3.88934247765487  
H -0.46455263447709 -1.10271423845744 3.79315403656546  
C 2.42760914408517 2.13040853301781 1.88908816771106  
C 3.38288907312078 1.18936052541631 1.49944124957877  
C 3.71805644188050 0.10526171017078 2.30789286847010  
C 3.07261826171182 -0.03602666620900 3.53820299985494  
C 2.09911365291270 0.86466410000763 3.96090577994235  
C 2.10808519443008 3.30921739154090 1.01043710941464  
H 3.86934971764453 1.30825113080162 0.53686452951477  
C 4.73259335124049 -0.91490121392471 1.85988658267819  
H 3.30975153756922 -0.88553322417885 4.17012608701397  
C 1.37198456234568 0.66616603974801 5.26392268523911  
H 2.47903032395711 3.14128096057543 -0.00233933596809  
H 1.03588229827290 3.50020260319193 0.96222813802618  
H 2.58879984925222 4.21833789277824 1.38985929140569  
H 4.24053892693367 -1.86092305818525 1.61316086662381  
H 5.27667946643716 -0.57426816476969 0.97624532617614  
H 5.46183074550056 -1.12295446503382 2.64777808474939  
H 1.59340040387064 1.46242970991547 5.98132100693486  
H 0.28820882954156 0.66320153554197 5.12631877895972  
H 1.66232878400584 -0.28114479761128 5.72118083481774  
C -2.97976408961421 4.61192344035248 5.58949140588116  
C -3.63683275001054 5.84351382757370 5.51943812256301  
C -4.21892182724603 6.43301911179460 6.63815970870546  
C -4.17937767980081 5.78116016126260 7.86651497555092  
C -3.54949060421661 4.54573973283621 7.96678865719977  
C -2.94404232112946 3.99418181560875 6.84514857851467  
H -3.69544788236204 6.33920639173951 4.55715999729109  
H -4.70939086875300 7.39440648925685 6.54603084466171  
H -3.51973538420859 4.00320363128705 8.90279231485974  
H -2.79781498302373 4.61689421468146 3.46407742245822  
H -2.95264411891313 3.01028381315556 4.19176278235583  
N -2.23942486757558 2.70926766702568 7.07146530513890  
H -4.63912848696981 6.22369572546046 8.74163144302247  
O -2.88131100181789 1.80959342830580 7.58362503602281  
O -1.05099049358807 2.66898590122939 6.78708347166356

**14a(3)**

125

Coordinates from ORCA-job

C 0.60331843674079 2.40785765942700 3.11834567621518  
N 1.88911852903463 2.03365257152189 3.24671052618946  
C 2.62034073251131 2.81993344006771 4.26210618927799  
C 1.46597589682767 3.46901973512061 5.01687333329518  
N 0.36607702695292 3.36506194062216 4.03836599106067  
C 2.56349586871313 1.02517143792876 2.49360918365951  
H 3.25626326903031 3.55942743714304 3.76895585709939  
H 3.23396953201541 2.16600746379811 4.88208311999444  
H 1.18885604411376 2.90401609416623 5.91478264854781  
H 1.65540026938415 4.50756847788946 5.27507073700092  
C -0.92226102695073 3.91725924030326 4.39298097000330  
Ru -0.71999578117405 1.40859422757937 1.83520786062396  
Cl -1.71580637232818 0.62757774204437 4.10888124821345  
Cl -2.06619073653955 3.39939667859791 1.46299332574613  
P -2.40997138857264 -0.07527206744445 0.72762447086806  
C -4.14214141910170 -0.15042813602185 1.52027933850251  
C -5.24613121322720 -0.76608973565570 0.64754739565368  
H -3.96357367127028 -0.79808028719710 2.38582932080214  
C -6.54232531219667 -0.92414521960446 1.45597977108704  
H -5.43699530425787 -0.10483475350018 -0.20439083398709  
H -4.94946463902117 -1.73071564065210 0.23814916728733  
C -7.00661676711353 0.41454990931560 2.04038448592274  
H -7.32342494076894 -1.35875601922387 0.82282828305947  
H -6.36637361480971 -1.63441911339536 2.27397998626151  
C -5.89157223010984 1.07292229028020 2.85973093357995  
H -7.29357691453569 1.08340916534848 1.21840579358154  
H -7.90201707498934 0.26956868771750 2.65407776786376  
C -4.59420068604261 1.21549132432529 2.05565160518055  
H -6.21183656537361 2.05750593934308 3.21527101419544  
H -5.68777942040703 0.46863694047442 3.75268277430597  
H -4.74899562846468 1.90506161902131 1.21954225992811  
H -3.81588103054500 1.64564878053939 2.67965972529628  
C -1.69343863411661 -1.84614968348751 0.84043385396714  
C -2.50854828930770 0.24109488044129 -1.14709303967018  
C -3.15275293220278 1.59544016448814 -1.46637282798262  
H -1.44483299266046 0.32285898648882 -1.38525389100719  
C -2.93015358720358 1.94835027560226 -2.94222494844750  
H -4.22862409523383 1.54645433663494 -1.26060622030152  
H -2.74209477529485 2.37173655494858 -0.82048858511478  
C -3.45308039384635 0.84736327508526 -3.87175746950044  
H -3.41033814904384 2.90420686642994 -3.17549191410912  
H -1.85557775218568 2.08658537214532 -3.11171458086926  
C -2.84238009813130 -0.51428213517919 -3.51884434298196  
H -4.54541970024017 0.78607998522577 -3.77855809526264  
H -3.24034121032511 1.09673982836623 -4.91675891609064  
C -3.07032294547750 -0.87180595071756 -2.04115625015808  
H -3.26054155752557 -1.29799153464688 -4.15909799169442  
H -1.76269334267842 -0.48709539724985 -3.71353547647996

H -4.14075182175531 -1.00372320008102 -1.86140537239479  
H -2.58431666721956 -1.82615917373512 -1.82409542616402  
C -2.68473927515109 -3.01540752900758 0.80014088557507  
H -1.06271563331254 -1.90632628167618 -0.05224863762090  
C -1.93842067119778 -4.35802332502259 0.80821331697581  
H -3.34893378797089 -2.96442624288138 1.67031033530262  
H -3.31637622453511 -2.96248657625809 -0.08689541871549  
C -1.00173537790327 -4.48302885375395 2.01315248738705  
H -2.65919594695905 -5.18185687265695 0.79849483651747  
H -1.35181737964225 -4.44204411986002 -0.11624059119601  
C -0.03255711715020 -3.29827899128823 2.08688911390576  
H -1.60004891573181 -4.51172710471331 2.93248560259896  
H -0.44826116319968 -5.42655644602621 1.96826738787750  
C -0.78910724470515 -1.96724642774163 2.07507281699644  
H 0.58239678971542 -3.36797849824911 2.98868511985248  
H 0.65566532324375 -3.33519388759466 1.23120987026274  
H -1.38133117626727 -1.85337022592008 2.98590148390579  
H -0.07273851577724 -1.13737641589641 2.10576107190771  
C 0.20330480690610 1.74731299983757 0.21161319121962  
C 0.24193302594794 2.98529451064311 -0.56391419626349  
C 0.78834367489528 2.78584209026190 -1.79691954866305  
C 1.19610770625141 1.36114542720490 -1.90118419282008  
C 0.89413311014370 0.74327184786491 -0.66178641655723  
C 1.70951997433139 0.62132056160477 -2.95258373217620  
C 0.92996945009995 3.80048639898921 -2.84015488245480  
H -0.12096208758485 3.92432815379382 -0.18482016341872  
C 2.04216255623688 3.82718768316266 -3.69657342630051  
C 2.17255469807651 4.82168955597298 -4.66015430753052  
C 1.19014076413868 5.80040223758109 -4.79548054198342  
C 0.07922466697912 5.78442093598094 -3.95226885099723  
C -0.04965048520972 4.79799093570365 -2.98313841017759  
H 2.82325922117464 3.08647299511242 -3.57992412199022  
H 3.04554960227246 4.83589496374636 -5.30341573175848  
H 1.28919803010825 6.57081931020587 -5.55203252059264  
H -0.69116143056612 6.54082514905628 -4.05468715265343  
H -0.91985732220749 4.77698272548462 -2.33764949217971  
C 1.97561023740409 -0.74489193365558 -2.75328220255348  
H 1.88841639186103 1.07265433037282 -3.92068094401995  
H 2.38043221790780 -1.33393351233431 -3.56852540469109  
C 1.72556506516420 -1.34145379915189 -1.52525249068007  
C 1.17721057442169 -0.59462178744082 -0.47165849667210  
H 1.95054050289514 -2.39080317638372 -1.37588743134880  
H 1.00670530697236 -1.06292699328717 0.48403876878276  
C 3.32473337167037 1.38720435640415 1.37589665683374  
C 4.04093809706793 0.38548214970178 0.71700087931281  
C 4.01349831749434 -0.93879106644552 1.14284594201919  
C 3.25260845759492 -1.26353224458469 2.27012826839563  
C 2.53178878657542 -0.29813353415073 2.96990001039006  
C 3.39154155106348 2.81131982453159 0.89143283968771  
H 4.61185786788940 0.64794032237508 -0.16766704228537  
C 4.77815042026801 -2.00838528836110 0.40602164179733  
H 3.23055534602372 -2.29017239175811 2.62206908665558

C 1.79113083663490 -0.65091572522827 4.23478372773158  
H 3.48205496043827 2.83970995647952 -0.19597185289605  
H 2.51219943457080 3.39051595214741 1.16632440354285  
H 4.26785675230008 3.31960410504098 1.30985461119239  
H 4.10601234306735 -2.79026325815079 0.03965574370385  
H 5.3080600001408 -1.59525727532713 -0.45373908875126  
H 5.51211841237880 -2.49066558854174 1.05915143013855  
H 2.26958326565746 -0.18416604070571 5.10283814119737  
H 0.75237138032912 -0.31408719805747 4.22874301650486  
H 1.80165614516677 -1.73031950063243 4.39403462434358  
C -1.25499230474386 5.30036504241667 3.86099063927761  
C -2.51416120919273 5.80255271330783 4.21169126844008  
C -3.00394481806540 6.99399237657277 3.69723822446276  
C -2.24526926541607 7.72490665901115 2.78437211842306  
C -0.99661390570523 7.25272101652043 2.41053282847655  
C -0.51452699183441 6.07330836174943 2.97098611503322  
H -3.13241637041859 5.21155687625343 4.87909031955806  
H -3.98625558658638 7.34312871893103 3.99200490634768  
H -0.38356844494215 7.78935412466729 1.69729322292119  
H -1.69493086853075 3.23130844358155 4.05236052209252  
H -0.98141920703667 3.93907164750260 5.48631700127575  
N 0.85277302114208 5.70590726127079 2.54064264917380  
H -2.62295334555350 8.64832780908684 2.36355074128449  
O 1.01990771784394 5.41347317492750 1.36750437981686  
O 1.74957696768282 5.79866312704428 3.37015660879508

**14a(4)**

125

Coordinates from ORCA-job

C 0.14660223313824 1.30136649533695 2.10775417520599  
N 0.55182826914502 0.83380075033204 3.30962745845117  
C 1.88481815559457 1.33169831238398 3.70931849914810  
C 2.17528539375556 2.38418553997494 2.64277436544957  
N 1.08782322814819 2.16535479399219 1.67860481108424  
C 0.01199842306769 -0.24610385849945 4.07891387160428  
H 2.60236292813519 0.50475121481387 3.69914858935832  
H 1.85156015870838 1.74084534654508 4.71914131480920  
H 3.14626108910336 2.24847327778244 2.16000344224925  
H 2.12090026624564 3.40631382818860 3.03015087147599  
C 1.15239250923024 2.86890281666848 0.41573386594979  
Ru -1.64378206660063 0.80313546086993 1.06089447739607  
Cl -2.96372614434771 0.73516557937454 3.25312210264435  
Cl -2.13562327736185 3.17585860816325 0.83517965541111  
P -3.83258071181777 0.02835579774620 0.13194624860294  
C -5.42986263191543 0.53931514523146 1.02564689859182  
C -6.74994286803441 0.09966372556417 0.37571234313607  
H -5.31479296886505 0.03261356076570 1.98822595671401  
C -7.92824984206109 0.43323840398507 1.30462713504211  
H -6.88574291877258 0.63100543758556 -0.57242516092242  
H -6.75498892313310 -0.96552617698869 0.14665227095947  
C -7.96558723717490 1.92492679926383 1.65456820119039

H -8.86870598581442 0.12437582152500 0.83501553042455  
H -7.82845169386691 -0.15200309679354 2.22725523852979  
C -6.62591475486588 2.39123177775891 2.23562458489595  
H -8.18234579445661 2.49960532364902 0.74412157742120  
H -8.78217259332713 2.12789304190903 2.35543363111434  
C -5.45233426885625 2.04940719265978 1.31070988168256  
H -6.64531655926743 3.46941677582322 2.42070936223651  
H -6.45577049323142 1.90938464017354 3.20614625440521  
H -5.55612642774391 2.60249817754633 0.37136831635375  
H -4.51520529560465 2.35792033108592 1.76417596711812  
C -3.56675975945301 -1.84751408356985 0.34979056850970  
C -4.02967580852711 0.24074942313613 -1.74328588644961  
C -4.37230472806006 1.69329920448966 -2.10346764517465  
H -3.01091024053586 0.04811957157215 -2.09054280052252  
C -4.26992656968666 1.90473708632413 -3.61828894725900  
H -5.39388741980072 1.91524293579387 -1.77736113848952  
H -3.71507450611406 2.38082729809778 -1.56607824370272  
C -5.15518415502543 0.91451096197394 -4.38296169683234  
H -4.54288049834391 2.93441058892599 -3.87169451026416  
H -3.22774658222289 1.76895202246659 -3.92598941473372  
C -4.83015390371717 -0.53344078689660 -3.99476853319644  
H -6.20948706507882 1.11984521019653 -4.15413593729340  
H -5.03493827953838 1.05244738305536 -5.46233969121581  
C -4.94320032262427 -0.74875436208685 -2.47769692269224  
H -5.49158967244107 -1.22892267635040 -4.52057066894908  
H -3.80584255105095 -0.76874213955510 -4.31145421607229  
H -5.98322153727611 -0.61033767513650 -2.17096140474067  
H -4.67080081703047 -1.77929285744071 -2.23531631436113  
C -4.80771742204601 -2.72901045339035 0.52453325711642  
H -3.06712221455852 -2.12933276075062 -0.58526435435375  
C -4.41773309747775 -4.21080540201115 0.62343217359243  
H -5.33838396519765 -2.43111725329382 1.43563647622590  
H -5.49929153797424 -2.58712513411876 -0.30725113991768  
C -3.40536722511586 -4.45295710079104 1.74694178600519  
H -5.31240467343729 -4.82222233858734 0.77513795048011  
H -3.97713843443267 -4.52680557467548 -0.33143153025641  
C -2.16903254555041 -3.56162315220806 1.57630326811031  
H -3.87613609733750 -4.23031723963812 2.71325615663287  
H -3.11018889448440 -5.50659122237391 1.77465411079963  
C -2.57916036841029 -2.08966242545428 1.50127305239402  
H -1.47784942668480 -3.71051016219427 2.40700531655229  
H -1.64723520624393 -3.85179936811335 0.65529366423941  
H -3.00825545357434 -1.76276530830527 2.44983586585336  
H -1.67153473094459 -1.45965657519251 1.38403182120019  
C -0.94871285065931 0.69112160294631 -0.72033949531700  
C -0.96466490686073 1.73673572480102 -1.74009381395033  
C -0.46827231318094 1.30349043502308 -2.93699300669791  
C -0.16115953571004 -0.14506229624480 -2.80050938751712  
C -0.42379783372110 -0.50654250302132 -1.45270039629529  
C 0.25157207232248 -1.10182841905163 -3.71418015328355  
C -0.21261068538210 2.15846825645873 -4.09531113382376  
H -1.27384193915094 2.74482191934228 -1.52375971688950

C 0.76667972489779 1.83958007331294 -5.05159240699405  
C 1.06595076911747 2.71536055620746 -6.08902224374479  
C 0.39358994488236 3.92916004362655 -6.19930553411969  
C -0.58482692715517 4.26004758592408 -5.26200534944796  
C -0.88547136714062 3.38789490931542 -4.22673737523677  
H 1.33623441386308 0.92790585763975 -4.95047783017192  
H 1.83937255384558 2.45627105404087 -6.80354772558237  
H 0.63539143640107 4.61720407155447 -7.00098728447513  
H -1.10744562702149 5.20648304756639 -5.33244301936475  
H -1.64369911045260 3.65868705686298 -3.50392347972063  
C 0.46240608159271 -2.41967059556311 -3.27595942197168  
H 0.39744929186487 -0.85936760894713 -4.75812427935321  
H 0.78877546832006 -3.17117457200757 -3.98592932317367  
C 0.25268234244555 -2.76580878844982 -1.94780829542959  
C -0.20330638981652 -1.80577485380098 -1.03211872624012  
H 0.42548907714142 -3.78352665684652 -1.61701167224095  
H -0.37860340882046 -2.09112192741979 -0.00733887220816  
C 0.27984691474810 -1.56284175780220 3.68427730252280  
C -0.18953423013624 -2.60298775462091 4.48512677458430  
C -0.89906894023686 -2.35677839973737 5.66147507368272  
C -1.10645385680253 -1.03329147929932 6.04501746610866  
C -0.65280357604904 0.03809827698916 5.27672780416867  
C 1.09956390174222 -1.85863966105874 2.45395892188603  
H 0.01547173465965 -3.62747505627557 4.19004743816833  
C -1.43567742377392 -3.50085931307224 6.48459007088714  
H -1.65301870627877 -0.82376980343974 6.95833915473551  
C -0.88066338916652 1.45746593145222 5.72135520507108  
H 0.98752911901637 -2.90154009275274 2.15321276725950  
H 0.81356531449961 -1.22970479669467 1.61314681650460  
H 2.16570380839845 -1.68297080012280 2.63855158933243  
H -1.79840038438283 -3.15667140558336 7.45455657783467  
H -2.27083274650370 -3.98992248759807 5.97225981268505  
H -0.66912755926710 -4.26161375992663 6.65871290389354  
H 0.04098109905513 1.90371292348733 6.11357490851503  
H -1.24002176788629 2.06449751329436 4.89075027972889  
H -1.62952525938215 1.49258514756537 6.51360348570265  
C 1.98844726499853 2.13476841898338 -0.62318897400134  
C 2.38990308396948 0.81711141615443 -0.38536381189031  
C 3.13279268124610 0.08859517720607 -1.30634133638086  
C 3.53166804265086 0.67309809137372 -2.50373491826763  
C 3.16108780094488 1.98174004762396 -2.77140923956022  
C 2.39030708427898 2.68774241329224 -1.85124890899413  
H 2.08445783791828 0.34556306550678 0.53603343643268  
H 3.38555021619448 -0.94228655964972 -1.09008256514324  
H 3.43459069668284 2.47510302894125 -3.69194953255704  
H 1.57107466086091 3.85969831723058 0.60306833034130  
H 0.14534245201798 3.04936277670167 0.06063092016821  
N 1.97266380778953 4.04117278596263 -2.26853184213750  
H 4.11052301866806 0.11379835093363 -3.22847969254070  
O 1.06707218407799 4.58129800846007 -1.64135237693812  
O 2.54085134666918 4.54731198489046 -3.22648910752135

**14a(5)**

125

Coordinates from ORCA-job

C -2.03402074423166 2.00008673958187 4.09714096255517  
N -0.73451291819533 1.97370799483405 3.71226385343418  
C 0.12776618663711 2.78664469316778 4.59587464944571  
C -0.90818049219480 3.66258932311501 5.28922173968478  
N -2.13021243216827 2.84794483698539 5.13747618577815  
C -0.16322263010800 0.96145956212726 2.88434677586965  
H 0.85520343971112 3.35497467623737 4.01782417134623  
H 0.65069663602916 2.13824639070713 5.30448171943136  
H -1.04875069374118 4.62471187232735 4.78129971162842  
H -0.67155646131245 3.84445855303385 6.33513310313119  
C -3.35126905258112 3.18675729753781 5.85539900901419  
Ru -3.56808724757214 1.02695324318759 3.01173158656767  
Cl -4.88932586060710 3.07737864069771 3.03752283902728  
Cl -4.50998101076333 0.06250596060499 5.20856431039371  
P -5.47463024526610 -0.21859670174718 2.01289738661487  
C -7.08542580490090 0.10710392261928 2.99481540802861  
C -7.92958171474328 -1.11253534451541 3.37269153238428  
H -6.66408645310564 0.50896005568203 3.91825939107977  
C -9.09355385023394 -0.69726280377140 4.28463430930536  
H -8.31781608583187 -1.61005576838883 2.47615279728217  
H -7.31036679772111 -1.83367853586932 3.90488383055155  
C -9.94820491413636 0.40783249017979 3.65816975123951  
H -9.70798306853624 -1.57282507928446 4.51886238785734  
H -8.67797080626478 -0.33867828951627 5.23344816203172  
C -9.08414106696893 1.61345814871802 3.27625901448410  
H -10.44189435764649 0.01768197600530 2.75775196258574  
H -10.74414966162718 0.70968925147401 4.34684547428505  
C -7.93380076387464 1.20846698186879 2.34557326069859  
H -9.69309717169918 2.38413651488620 2.79205414048462  
H -8.66346088591912 2.06517961482275 4.18203998238051  
H -7.31126928780233 2.07762767113312 2.13486853051629  
H -8.35354119286148 0.85449823847069 1.39772280230692  
C -4.85282657126605 -2.04301821338913 1.98396584654935  
C -5.73145130506115 0.04382242112516 0.14313878095037  
C -5.86818171266318 1.50813398353212 -0.28630770659008  
H -4.75936136250116 -0.29896447918486 -0.22487766657674  
C -5.71448174882423 1.61673365795559 -1.80822863557998  
H -6.85084220389425 1.89011218684458 -0.00214949712132  
H -5.13384228817413 2.12779386635733 0.22467733967653  
C -6.75696984569081 0.74995639342771 -2.52572713750654  
H -5.80930222604253 2.66207561952686 -2.11958988683457  
H -4.70577832499677 1.29473638235617 -2.09335607040904  
C -6.69731389152874 -0.70834411384043 -2.05401148476186  
H -7.75801257373538 1.15226020298105 -2.31966097377414  
H -6.61717927481234 0.79905451387620 -3.61050870596208  
C -6.80319863656976 -0.82589733953228 -0.52420497742044  
H -7.49026125284030 -1.29505541610460 -2.52904068724522  
H -5.74436767994420 -1.14962295312621 -2.37372512776409  
H -7.79785009393260 -0.50573600550971 -0.19674896886871



H -6.69453421749719 -1.87373573726956 -0.23431513283397  
C -5.82239049575972 -3.22280416138166 2.13001818421038  
H -4.46143480461238 -2.08369591086065 0.96174927992085  
C -5.09378280936490 -4.53614914213456 1.80536031706773  
H -6.19004691412594 -3.27311915585430 3.15707977619397  
H -6.69575162115286 -3.10319986359149 1.48635816597534  
C -3.87514781726047 -4.73744057629131 2.71446598860052  
H -5.78419611071828 -5.37958211281804 1.90746674902391  
H -4.76932173864118 -4.51935346685429 0.75636598981694  
C -2.92400581291917 -3.53554581009907 2.65256408559638  
H -4.21808737452497 -4.86659950924672 3.74805618907099  
H -3.34402559382048 -5.65524015075954 2.44193630858178  
C -3.67020125040234 -2.22910213872132 2.94201367599869  
H -2.10399537372783 -3.65885616066467 3.36653863833007  
H -2.46717850699217 -3.48828549087748 1.65532808933818  
H -4.02157021233787 -2.20327066898202 3.97421227453677  
H -2.96893903270108 -1.38437561479136 2.86111494606164  
C -2.81213007253482 1.51581849561098 1.33734410619871  
C -2.71725832373627 2.86380371921862 0.77713337909790  
C -2.27102579453454 2.84601530249668 -0.51095604206108  
C -2.00493202631437 1.43547605614284 -0.88752324948546  
C -2.29736226292029 0.63132103817326 0.24321943492469  
C -1.60797646435976 0.86102463819017 -2.08281544916379  
C -2.09168348006867 4.01563525353798 -1.37016095237532  
H -2.99161623493495 3.74443066161255 1.33418546480530  
C -1.01995210907116 4.10943378158626 -2.27230372756063  
C -0.84545554830430 5.24853627406136 -3.05139425813358  
C -1.74345000568845 6.30937637641472 -2.95392186574310  
C -2.81463063374091 6.22751906304345 -2.06451196112480  
C -2.98669245147332 5.09483934716686 -1.27908030153402  
H -0.30529782631386 3.29848063481745 -2.33749055975402  
H -0.00436588531268 5.31023501951304 -3.73316890058757  
H -1.61037765322814 7.19387677971845 -3.56653252594318  
H -3.52017493248913 7.04745985667273 -1.98754822315007  
H -3.82766858666469 5.02263657952992 -0.59929081025315  
C -1.45966830025987 -0.53537225115648 -2.14738514707718  
H -1.43329659556153 1.46480054068454 -2.96464269542257  
H -1.14855351406202 -0.99702017088733 -3.07782256777512  
C -1.71210672510193 -1.32370390398873 -1.03293436816075  
C -2.13572574051841 -0.73902214831725 0.17049476476049  
H -1.58575439982231 -2.39885283757155 -1.08873823399436  
H -2.32050041306255 -1.36269734352462 1.02854358082753  
C 0.48707472653200 1.33229935965585 1.69698871158166  
C 1.03021068042139 0.32858287104182 0.89758210945443  
C 0.94352622085202 -1.01693486976810 1.24925391108220  
C 0.32794811426590 -1.34840432122753 2.45705412623260  
C -0.21085289165419 -0.37926641422956 3.30535265544486  
C 0.62037054158708 2.77537259553357 1.28638221138663  
H 1.50410242068998 0.60496870657089 -0.03907272786607  
C 1.51148928834616 -2.08093936597115 0.34581267163106  
H 0.27967358142266 -2.38953798666885 2.75993266271525  
C -0.76174207076409 -0.76985620117705 4.65528664931903

H 0.61801560526120 2.86887658695073 0.19925984205028  
H -0.19577731430620 3.38109506933202 1.67632603072614  
H 1.56543059514568 3.19557508856515 1.64990491802927  
H 1.29308468095849 -3.08137864388732 0.72501706551796  
H 1.09008272447413 -1.99836321635374 -0.65964560854330  
H 2.59848894003095 -1.98521261694017 0.25697030642021  
H -0.28083301889772 -0.20546687998189 5.45757661964751  
H -1.83299694146625 -0.58837320893509 4.76560208739953  
H -0.58414977169090 -1.83032850423362 4.84007847491938  
C -3.09756510467705 3.49975382198110 7.31283125953471  
C -3.71668151514973 4.61753433705804 7.88111100360575  
C -3.52489998201371 4.96643647524607 9.21435587327760  
C -2.66742496708372 4.21866429342097 10.01698157173081  
C -2.01539965561785 3.11628927965180 9.47725457178226  
C -2.26148058679688 2.76433461920500 8.15654390974795  
H -4.35676439518404 5.22537876845384 7.25139830037190  
H -4.03128502288265 5.83397129169478 9.62073509254681  
H -1.32913440231040 2.52245348776227 10.06774438180411  
H -3.83715863293171 4.04631542868481 5.38941649279769  
H -4.02763793470706 2.33518877659551 5.76218499993535  
N -1.56528911284895 1.55305576181468 7.66793353875551  
H -2.49844437597639 4.49323537067322 11.05095278565137  
O -0.33567604070597 1.60311359980526 7.61584545918333  
O -2.24591031296913 0.58892871392116 7.38732044313498

**14a(6)**

125

Coordinates from ORCA-job

C 0.62743031027453 3.67355334681425 2.08877505925612  
N 1.77925123714653 3.13149151025180 2.54448607468933  
C 2.60693279680982 4.07975500886338 3.30944978328147  
C 1.64410682217835 5.26159292649047 3.47550055144634  
N 0.55471409040389 4.92863956261962 2.53908881025648  
C 2.30845046175664 1.90259377098690 2.03233664883855  
H 3.50283762588270 4.34288838826616 2.73856746156035  
H 2.91485918972805 3.64584876557804 4.26067711602718  
H 1.24248804911144 5.33353403868879 4.49009005453627  
H 2.08932123175882 6.22281964705041 3.20899119295084  
C -0.46091482884475 5.93153424620279 2.26942513284015  
Ru -0.61428037292653 2.35297932142944 1.03295827624332  
Cl -1.39511491736932 1.66252471170421 3.39863195300345  
Cl -2.54971861719888 3.81597944503692 0.90754675195967  
P -2.06207468173276 0.43866590191539 0.25319305690089  
C -3.79276344964927 0.47778218728913 1.08325077920064  
C -4.41058461877472 -0.86658393655828 1.48975344852792  
H -3.54983762879411 1.02752937292257 1.99449259921603  
C -5.50604153292804 -0.61380345983162 2.55541764025668  
H -4.84153897556179 -1.35217237975540 0.60672387753915  
H -3.67979707106145 -1.56012673062559 1.90074119831412  
C -6.18961733258719 0.75816447104101 2.38151967980566  
H -6.25207464353411 -1.41385854640894 2.49749333414191

H -5.05738334871850 -0.67134738644138 3.55160573205065  
C -6.25495198754449 1.13527215359811 0.90029615908075  
H -7.19067168331884 0.73807068440780 2.82217102172661  
H -5.62759234535684 1.52574861823085 2.92262144521403  
C -4.83847518980603 1.28225822231840 0.28598900801271  
H -6.81424679313506 0.35725423580615 0.36650926890690  
H -6.81237076147043 2.06546516860762 0.76143182728274  
H -4.87756007480577 0.93062547535886 -0.74572186292891  
H -4.53479375839263 2.32714378873805 0.26329621126665  
C -1.40780850054086 -1.30747679051427 0.70361948896081  
C -2.24932921004982 0.30536624185780 -1.63648567810616  
C -2.63725452124487 1.62288583386008 -2.32131817720516  
H -1.21757875003257 0.10730534898601 -1.93845646656995  
C -2.45834287363907 1.48979054919321 -3.83809887712357  
H -3.67571915171327 1.87871746878499 -2.10182178260314  
H -2.03922254873527 2.44639841233399 -1.93342911965106  
C -3.29351051481242 0.32654790566153 -4.38850816359360  
H -2.74074217795601 2.42632899152409 -4.32967482195634  
H -1.39762333461962 1.32224109861752 -4.06272988717853  
C -2.96647807067646 -0.98953154854945 -3.67120347138372  
H -4.35843762823582 0.55527353337180 -4.24887077345051  
H -3.13505814518802 0.21597137840902 -5.46629372685331  
C -3.10461819203865 -0.86250953572869 -2.14534753160086  
H -3.61193950614468 -1.79397687893828 -4.03853338676639  
H -1.93489547043173 -1.27944614853173 -3.90843305526633  
H -4.15532683233364 -0.69987912077770 -1.88457172046338  
H -2.80727236344608 -1.80185525855046 -1.67076680735777  
C -1.06481743207251 -1.44245531256977 2.19335017400243  
H -2.24889136155859 -1.96897415445637 0.47709657714748  
C -0.76081623463087 -2.90476342287880 2.54176024973244  
H -0.19490099430779 -0.81794015374429 2.41221427867676  
H -1.85723229479007 -1.05078734311568 2.82862784296770  
C 0.37245337917083 -3.46909235036139 1.67752594068681  
H -0.50472962210770 -2.98621855878253 3.60314706409141  
H -1.66628655661863 -3.50722657526092 2.39147777188716  
C 0.09476278634661 -3.26130467379940 0.18499414721828  
H 0.52771704087277 -4.53142093479214 1.89089820614105  
H 1.30467787986536 -2.95460290549841 1.93623565961014  
C -0.21320854251391 -1.78965925930241 -0.12825263172713  
H -0.76045930282844 -3.87797202974913 -0.11967973067520  
H 0.95005070421038 -3.59755125741354 -0.41160271243829  
H 0.66466659290556 -1.18888726794749 0.12834616791392  
H -0.38881141869795 -1.67211411988027 -1.19934439239333  
C -0.03123055716134 2.95865240043429 -0.67873754029608  
C -0.23227828204321 4.30077165803139 -1.22978814806400  
C 0.26355722073992 4.40764720388242 -2.49733439729464  
C 0.87559728535578 3.10450644962835 -2.86220677368102  
C 0.69524360360420 2.23344275822987 -1.75986498405684  
C 1.56571013120942 2.68415754399745 -3.98600457591445  
C 0.17297291490659 5.58646745920408 -3.35777425788684  
H -0.78939499545457 5.06927177998918 -0.72056397672834  
C -0.05064892001417 5.46551963405775 -4.73910657520629

C -0.18582716082476 6.59614499564663 -5.53704763359906  
C -0.08982077872858 7.86752137077896 -4.97499039746180  
C 0.13238015380590 8.00198762226090 -3.60485192811819  
C 0.25956970523773 6.87461949468463 -2.80397356481109  
H -0.16123990745851 4.48193054502604 -5.17800372002038  
H -0.37552516179746 6.48462430344250 -6.59868656375295  
H -0.19204454095636 8.74812766527039 -5.59856424762523  
H 0.20638582851395 8.98786932132940 -3.16009939474596  
H 0.44216444362026 6.98205358037114 -1.74115065278369  
C 2.05430260703218 1.36531640137093 -4.02567581462531  
H 1.74198501378159 3.35200636653787 -4.81991549600488  
H 2.59009861635707 1.02280365452093 -4.90380496203558  
C 1.86018819248589 0.50273899680520 -2.95451958994256  
C 1.18100844808168 0.94357396028291 -1.80730004059283  
H 2.24160185590513 -0.51095509913299 -2.99746386288894  
H 1.04895287090387 0.28607827838703 -0.96462949308685  
C 2.96937642640086 1.91078983433120 0.78923969307276  
C 3.49137063454776 0.71001006413501 0.30976971784442  
C 3.38353136440815 -0.47831188144405 1.03269171891611  
C 2.79052892525174 -0.43620933160815 2.29442056390438  
C 2.27072549149207 0.74328992466027 2.82904879764771  
C 3.18761596619035 3.18361287856969 0.01381882027342  
H 3.98436093541270 0.70613262951695 -0.65606476221451  
C 3.88247819388946 -1.77742608279644 0.45450485404631  
H 2.74358219582581 -1.34031453663357 2.89164216583025  
C 1.76204437175319 0.77924106450591 4.24246670966351  
H 3.39773928265980 2.96263865073567 -1.03233817814035  
H 2.32575665675475 3.84795717580577 0.04977832199873  
H 4.04789521659249 3.72927966180665 0.41834616937319  
H 3.10987420299162 -2.24349848056264 -0.16741641178638  
H 4.76082219849933 -1.62152622538032 -0.17604095057853  
H 4.14244062613196 -2.49076552279551 1.23899320293598  
H 2.48658777153472 1.28430983156766 4.89171514303467  
H 0.80916666090419 1.30314100321965 4.30791528238254  
H 1.62544691365722 -0.23271398389019 4.62632534824657  
C -1.36838506877048 6.17449724660575 3.46081522945935  
C -1.76271266254504 5.07532724695733 4.22958394256403  
C -2.59359978572617 5.22517026549561 5.33302812932886  
C -3.04235473619888 6.48848845138036 5.71656129637793  
C -2.66599674235194 7.59758298271653 4.97570259554218  
C -1.85375240543570 7.42888473704970 3.85436913181844  
H -1.44085739084248 4.08115851767583 3.94467041825482  
H -2.89440596133008 4.34334614958461 5.88623813855875  
H -2.98989598353470 8.59508518626896 5.23663440729936  
H 0.04603930072432 6.84387665822164 1.96211750490913  
H -1.07496908083382 5.58662418630041 1.44029028996829  
N -1.54894995357889 8.65068866014773 3.08877728191037  
H -3.68747839944900 6.60911904701316 6.57857886674998  
O -1.54169031999411 9.71562024064691 3.69287611942874  
O -1.33423846507890 8.53935371310183 1.88408108652554

**14b(1) – global minimum**

125

Coordinates from ORCA-job

C -2.12019530777102 2.84581625868012 -0.92230748248688  
N -1.25188365545675 2.91316998365970 0.10394749805338  
C -1.00185480745445 4.30143310342485 0.54697651521300  
C -1.63212469003175 5.12236188250268 -0.57946167570802  
N -2.41238973166227 4.10660131007018 -1.29727636341409  
C -0.78292211059093 1.84547859813809 0.93057223976483  
H 0.06733509016488 4.47902745443996 0.66196148504364  
H -1.48709390239516 4.47134709800391 1.51282163112377  
H -0.88545312051274 5.56388817191719 -1.24760278480951  
H -2.28611120358644 5.91837637538891 -0.21600134463425  
C -3.31427511741901 4.51267315399558 -2.35174464474492  
Ru -2.88707269823547 1.19294724649225 -1.90619284184301  
Cl -5.09404839171870 1.91133214463077 -0.96546119547733  
Cl -0.79489455963636 1.13938553514609 -3.31070176256079  
P -3.81659714106504 -0.35455335033591 -3.65478457963921  
C -5.60396088926920 -0.97310851767335 -3.45891291681611  
C -6.04550729089410 -2.13697676287389 -4.36148033321125  
H -5.59801751637618 -1.32785213233101 -2.42110989844503  
C -7.43440773496476 -2.63527692597629 -3.93433160626217  
H -6.08818642694050 -1.80175380417833 -5.40091288377942  
H -5.33501805357363 -2.96296582262323 -4.32837980096954  
C -8.47209983350968 -1.50699147448798 -3.95957110576160  
H -7.74980327818486 -3.45805320789548 -4.58435609599155  
H -7.36764633460626 -3.04380126030298 -2.91821880011496  
C -8.01146422329218 -0.30649754682651 -3.12523376070176  
H -8.62592725646084 -1.18543375077155 -4.99793184542311  
H -9.43885234508260 -1.87407271388300 -3.60048226489035  
C -6.61918832544038 0.17793746969137 -3.54924312598477  
H -8.73007875342359 0.51501403948386 -3.20886726387329  
H -7.97742388670606 -0.58556530538220 -2.06462586200979  
H -6.66682841125716 0.53897150041416 -4.58208045761102  
H -6.30599233662960 1.00727233537509 -2.91841680863350  
C -2.67673796015997 -1.87991581128712 -3.78247456029675  
C -3.62581774857920 0.57257395408953 -5.30769553498585  
C -3.87398062364131 2.07372459746548 -5.10323191711822  
H -2.55531887398510 0.45437304284652 -5.50411594535461  
C -3.54483503288736 2.86619005608105 -6.37334604467822  
H -4.91364502334305 2.24995031692753 -4.80728717531351  
H -3.23507617433714 2.42851448642157 -4.29198726635701  
C -4.31362796771010 2.33319505119510 -7.58655041089790  
H -3.76157602841285 3.92631174790343 -6.21772227301271  
H -2.46744991057326 2.79037659904530 -6.56199507463644  
C -4.07178935013665 0.83198249349901 -7.77761301261987  
H -5.38807367755196 2.50615215429914 -7.44026389864255  
H -4.02617777071024 2.88379596668989 -8.48764492002642  
C -4.42358470788344 0.04469567088205 -6.50681717264291  
H -4.65966667037640 0.45438360869629 -8.62037610058736  
H -3.01706150942488 0.66282397509798 -8.02718290616643  
H -5.49481796149679 0.15663166895000 -6.31193476834738

H -4.24125465266398 -1.01905262676452 -6.66209420627571  
C -2.50646208505052 -2.51321674589163 -5.16933798081976  
H -1.71663143306663 -1.43387155376006 -3.51051558504985  
C -1.42368104795518 -3.60313002697568 -5.11971658674089  
H -3.44971954813599 -2.95619249056581 -5.50705145813649  
H -2.22182970368782 -1.75709452869661 -5.90459917162533  
C -1.72440247235406 -4.66020881781678 -4.05119250320317  
H -1.32491909829301 -4.07134803225099 -6.10443124847675  
H -0.45903637591417 -3.13054283793180 -4.89692684248187  
C -1.92859113789471 -4.01315013681411 -2.67717322057449  
H -2.63359542038656 -5.20930554555506 -4.33201428227898  
H -0.91431599591531 -5.39530462484517 -4.00945385574818  
C -3.02494538238159 -2.94201709643401 -2.73107018052002  
H -2.18152668627640 -4.76918583254548 -1.92817365936215  
H -0.99181650074291 -3.55098935325557 -2.35058271236478  
H -3.97494592951270 -3.42392766988882 -2.98179000439576  
H -3.16126135696493 -2.48889810033652 -1.75122506434414  
C -2.37541955651139 -0.20970517536850 -0.78238515344383  
C -1.06584949138843 -0.86301760689201 -0.82038102430506  
C -1.00316760844440 -1.90385871862354 0.05590347022640  
C -2.29907557147956 -1.97575885592806 0.77968642467985  
C -3.15278180707213 -0.97405662609587 0.24601781120318  
C -2.72027554361818 -2.76524036722287 1.83521785326556  
C 0.12793554278494 -2.82027555432383 0.19746706393528  
H -0.29495573866226 -0.57174411045030 -1.51168304734250  
C -0.04704227902760 -4.15264992738483 0.60640681684456  
C 1.03775408037951 -5.01771229338563 0.70834985444341  
C 2.32151568782683 -4.57339394799167 0.40355576022206  
C 2.50935523247562 -3.25845080691491 -0.02379077640737  
C 1.42782864355360 -2.39537689466483 -0.12879140919401  
H -1.04246184961201 -4.52376239457081 0.80587166217525  
H 0.87747823901775 -6.04329472896979 1.02085365500309  
H 3.16761077997928 -5.24532659174789 0.49007604041127  
H 3.50368101299753 -2.90608355034515 -0.27433278574339  
H 1.58210598112196 -1.37501302405120 -0.45197416003470  
C -4.02193619590928 -2.59493228255407 2.33610581866878  
H -2.06106659596467 -3.48807509162065 2.29740007211810  
H -4.35830219510172 -3.20925365244559 3.16414135759826  
C -4.87491524146854 -1.65367438836196 1.77909017920499  
C -4.44220134430672 -0.83041491448594 0.72683051650668  
H -5.88161933870786 -1.53933478301525 2.16418654653009  
H -5.09351186597246 -0.07626895641895 0.31032672959506  
C 0.53576268264495 1.39972132134676 0.76281436920348  
C 1.00908525416103 0.41641946177686 1.62733723341274  
C 0.19560350551846 -0.14920163124557 2.61141939231197  
C -1.10299847935965 0.33472176387380 2.76031081343910  
C -1.60886883191420 1.34858927792440 1.94706860457238  
C 1.39372596875775 1.93443486198031 -0.35293804343729  
H 2.02571207665587 0.05752070527944 1.51069007002414  
C 0.69569098789279 -1.29092531917106 3.45638311003147  
H -1.74767079795798 -0.09436512999290 3.51992066772703  
C -2.99471538038775 1.89244134521918 2.16859366185872

H 2.36885450603120 1.44431627990465 -0.35550793078022  
H 0.91511432808247 1.77110899030145 -1.32243789691997  
H 1.56651165303156 3.01087747419833 -0.25607915954827  
H 0.53245793721927 -2.24298394691899 2.93976817301431  
H 1.76785432342889 -1.20705101215565 3.64785965819154  
H 0.17545158784311 -1.33627425430969 4.41480345711967  
H -3.57218723349527 1.94684816834502 1.24543840650066  
H -3.54076507804272 1.26315027605751 2.87177147899606  
H -2.95268450895729 2.90393187370481 2.58969828045764  
C -2.61933237955544 5.07552369767859 -3.57305365428874  
C -3.22314342489880 6.10649060379089 -4.29850971279658  
C -2.64105436367831 6.59272610333740 -5.46203139276986  
C -1.43995301555821 6.03506351996173 -5.88509964279454  
C -0.81210062908245 5.01632459697639 -5.17824028099777  
C -1.40591486367745 4.54131240302665 -4.01634415118979  
H -4.16039302214374 6.52867912475674 -3.95318119677839  
H -3.09258999870909 7.38563742531037 -6.04122558303494  
N -0.82038538755203 6.53513674835979 -7.12847801439700  
H 0.11434963692462 4.60142308693454 -5.54800049516423  
H -3.93594438724950 3.65573967195387 -2.61626803012844  
H -4.00904985315993 5.25635797871114 -1.94626554301996  
H -0.94397434291695 3.72021092995734 -3.48226438652231  
O 0.22938739801847 6.01761658702953 -7.48666551606336  
O -1.39537278241456 7.43484761554340 -7.72786834170926

**14b(2)**

125

Coordinates from ORCA-job

C -0.18928918966509 0.82195927381262 0.97672544955149  
N -0.68281612168032 0.56839086955170 2.20270024512392  
C 0.15545115304408 1.10153646007358 3.29215229711810  
C 1.13959071476907 1.98825271631188 2.52850677000057  
N 0.93613612388922 1.56484703934645 1.13173856030619  
C -1.90786269843803 -0.10934997772397 2.50419210054048  
H 0.65152594241154 0.28075811976481 3.81761995832744  
H -0.45774121870862 1.65065899315213 4.00800476879296  
H 2.17639660472924 1.84415900174937 2.83766121533994  
H 0.89843756426991 3.05400654685821 2.62249151518511  
C 1.59083267788680 2.33459093964143 0.09034385634679  
Ru -1.13658334206715 0.26740848356821 -0.79127811349538  
Cl -1.39265801761473 -2.09800333596618 -0.13557879631843  
Cl -1.44014748911257 2.69770695626911 -1.24085956809178  
P -2.60425895585835 -0.35384990170227 -2.77012839498963  
C -4.10715186768885 -1.36859516732962 -2.18757806926514  
C -5.26908700905958 -1.52485157651090 -3.17978916762245  
H -3.65207537465588 -2.34956437369442 -2.01142298116819  
C -6.33085421788979 -2.48216972043636 -2.61775797778999  
H -5.73258165042784 -0.55002130944145 -3.36069793905520  
H -4.92040011380129 -1.88776289900025 -4.14448549165921  
C -6.84374362093957 -2.01030668714863 -1.25324176961914  
H -7.16037164728657 -2.57563572733883 -3.32625698606792

H -5.89035529618266 -3.48188309561478 -2.51332367600425  
C -5.68947252052424 -1.80557014780259 -0.26642926469907  
H -7.37994005646900 -1.06064914885432 -1.38192394976666  
H -7.56764745356974 -2.72689490435335 -0.85067785083457  
C -4.62018738642070 -0.86189155218232 -0.82846884811759  
H -6.06479945948350 -1.41240050912376 0.68126239747849  
H -5.22029432546820 -2.77106752222419 -0.04050296112625  
H -5.04276675847787 0.14139425717224 -0.93704271824159  
H -3.79510621290459 -0.79638258950107 -0.11906424796558  
C -1.70262756773623 -1.41232136783761 -4.08977688815136  
C -3.19420322519612 1.21241271254412 -3.68900160784601  
C -4.28560656948864 1.95236722293105 -2.89984965577746  
H -2.29722346261558 1.83579690501898 -3.62733141855612  
C -4.53758374697899 3.34017244562369 -3.50034634858583  
H -5.21703107015992 1.37839009221078 -2.92421263709460  
H -3.98474903661138 2.05640454036468 -1.85837896800544  
C -4.90790594755461 3.24716338330132 -4.98423413052954  
H -5.33043052187650 3.84739775194578 -2.94087490287409  
H -3.63062872116669 3.94277330101171 -3.37877497769066  
C -3.84263115517616 2.47653521790113 -5.77093245229829  
H -5.87166773903275 2.73078481247834 -5.08412897073099  
H -5.04191637330861 4.24695944725862 -5.40949421935809  
C -3.57734254028295 1.08735606068466 -5.16842411395940  
H -4.14017695183744 2.37324844024646 -6.81967168267615  
H -2.90611697877065 3.04859158180072 -5.76335979069813  
H -4.47362171002422 0.46660636060580 -5.27575794679616  
H -2.77951437807277 0.60225011030913 -5.73598213923375  
C -2.56836667135620 -2.11533338005230 -5.14851508963198  
H -1.08421387191949 -0.65693147554716 -4.59005808894231  
C -1.67662178651362 -2.71400096771433 -6.24813120283546  
H -3.12682728667309 -2.92405459117374 -4.66535987740366  
H -3.30095829253551 -1.44705611344778 -5.59776465064653  
C -0.64556968393060 -3.69283351338111 -5.67636641628305  
H -2.30100360019989 -3.21239753377146 -6.99726187246320  
H -1.15641037519899 -1.89757901597505 -6.76573873038185  
C 0.15937314216616 -3.04880259089470 -4.54322476646767  
H -1.16997047296138 -4.57385833430670 -5.28421982702884  
H 0.01914199194490 -4.04938381561612 -6.46936866478539  
C -0.75988105027560 -2.45350116051060 -3.47271865336104  
H 0.83175000243023 -3.77992064252871 -4.08395532909452  
H 0.79707948264525 -2.25243039979334 -4.94822303217296  
H -1.35349059549160 -3.24717199140722 -3.00735133304054  
H -0.16909462729804 -2.02676660713057 -2.67222336205306  
C 0.43473338399415 0.06428419006000 -1.76441901638443  
C 0.72935518601997 0.71772594492717 -3.03792225178439  
C 1.91407190344318 0.27009674706273 -3.55126893822342  
C 2.47521362232137 -0.73535045754940 -2.61011860503632  
C 1.58713047653613 -0.83970964972017 -1.50969435819854  
C 3.59000497984237 -1.55149887784131 -2.69015603026389  
C 2.51004483338849 0.68958773606639 -4.81871117401108  
H 0.10461707885016 1.48677478779283 -3.46482188680445  
C 3.90152661871249 0.76940775583998 -4.99284947275582



C 4.44189546540725 1.20189929685685 -6.19924686557026  
C 3.60706404561604 1.54997244435191 -7.25901679659893  
C 2.22319923114774 1.46883096381594 -7.10312592800702  
C 1.68058321483051 1.04532631410396 -5.89686989312794  
H 4.56650310731716 0.52823726682059 -4.17624267941763  
H 5.51876458381898 1.26783760133205 -6.30579420487825  
H 4.03044608870699 1.88010910437173 -8.20075465641837  
H 1.56759489518602 1.73054513203444 -7.92591130425222  
H 0.60566350600726 0.96581138643641 -5.78439325880468  
C 3.84162276285046 -2.45627981210716 -1.64466321517929  
H 4.25842015604076 -1.51499146757169 -3.54056808252856  
H 4.72206561705474 -3.08700161408374 -1.69097644294893  
C 2.97445382801643 -2.55212384368884 -0.56299140643111  
C 1.82865625872699 -1.74596728705740 -0.49202564408267  
H 3.17759353463589 -3.26514582778731 0.22829892507593  
H 1.12280706108890 -1.85087203340689 0.31913869025876  
C -1.86944305420926 -1.42766439047545 2.97780844621718  
C -3.07509406298242 -2.04990265892881 3.28849915109612  
C -4.29941226931293 -1.39583473920499 3.14646025377559  
C -4.29864448228180 -0.07725921940910 2.69595264725539  
C -3.11461660845745 0.59168868688502 2.37761213688076  
C -0.57096739790014 -2.17124558590667 3.14690813299432  
H -3.05888516436783 -3.07955001915804 3.63094204283028  
C -5.58717916644131 -2.11099344981632 3.46846261310289  
H -5.24025204017361 0.45223936602762 2.59403719922087  
C -3.14826314457843 2.03498538702911 1.94519923170086  
H -0.71044407411091 -3.23060087921743 2.92996556424592  
H 0.19329573323109 -1.79446618703435 2.46889289131030  
H -0.19881005490839 -2.08431108233805 4.17501081786084  
H -6.44427994781059 -1.43856103291676 3.39918576465859  
H -5.75441636573117 -2.94052120880264 2.77483104817627  
H -5.56488526311931 -2.52931939311423 4.47885821876313  
H -2.49442396408285 2.64980129463291 2.57138041238742  
H -2.81084004524435 2.18152424336848 0.91713172763808  
H -4.16156444988781 2.43171409560673 2.02593765340076  
C 2.96984764980918 1.86387636007948 -0.30296241547999  
C 3.58172929712316 2.47923831953844 -1.40138787868995  
C 4.79651281010278 2.02206900799259 -1.88461420308375  
C 5.40094167258177 0.94234054237102 -1.24746414540202  
C 4.84483275106315 0.34829259098620 -0.12176209968999  
C 3.62254588257345 0.81449636421501 0.34200014731487  
H 3.07690941139357 3.29286836441316 -1.90937579426643  
H 5.26164849903001 2.45928638801979 -2.75547014720058  
N 6.61349486556451 0.35752056721668 -1.83234428703316  
H 5.34290096602813 -0.49299406298103 0.33584803428720  
H 1.64769672746140 3.37636395425484 0.43000119551220  
H 0.94570734288739 2.35106544896762 -0.78490774203189  
H 3.13865101865002 0.31250826054781 1.16808885377425  
O 7.19869942792796 -0.50983382311808 -1.19647085707015  
O 6.95779612576508 0.75408389833950 -2.94354210194190

**14b(3)**

125

Coordinates from ORCA-job

C -0.29184501890450 -2.03607884373974 0.82986481158885  
N 0.98986530809401 -2.17112951255525 1.19210859723561  
C 1.23253857132295 -1.78325146420348 2.59876702366751  
C -0.16869934277637 -1.37997380025947 3.08681654746659  
N -0.99466487980465 -1.60440451145591 1.89331300592523  
C 2.08124451701800 -2.59624956087064 0.36905232191986  
H 1.94972701672871 -0.96012961384713 2.63801688185563  
H 1.64498465367451 -2.62649476645701 3.15549850546831  
H -0.22384092497140 -0.32837155724563 3.38476673071457  
H -0.52128728881679 -1.99380569229950 3.91906284594828  
C -2.37109827975001 -1.16197487120865 1.85721376805009  
Ru -1.24668631476706 -2.34875231632750 -0.96659343538588  
Cl -1.75093495022692 -4.66797269526935 -0.17336245545202  
Cl -1.23377277253384 0.17008552028964 -1.08929569040843  
P -3.01290514653922 -2.54119946553651 -2.75858590694954  
C -4.59440510029192 -3.27630710001954 -1.99797680518147  
C -5.88609025992068 -3.14998678615577 -2.81670183618377  
H -4.32100500218956 -4.33477106777568 -1.92823312734036  
C -7.02643237769852 -3.92492706376670 -2.13807670141827  
H -6.17145834509596 -2.09675324193534 -2.89274743483836  
H -5.74468436389246 -3.51158006972110 -3.83501599279486  
C -7.24359321501397 -3.45741976850833 -0.69377000889399  
H -7.94804965768323 -3.81098345912473 -2.71835725093998  
H -6.78322839139917 -4.99493713034899 -2.13855821642589  
C -5.94785667567713 -3.54713015046473 0.12058674958624  
H -7.59200421554471 -2.41644776946704 -0.70359655035370  
H -8.03297094663562 -4.04826048055142 -0.21906131238532  
C -4.80596469128870 -2.78301988320849 -0.55766215547027  
H -6.10173662346694 -3.15939195650454 1.13154700855986  
H -5.65200666925123 -4.59722194630028 0.22908181973880  
H -5.03034787826282 -1.71223359425059 -0.55635971070884  
H -3.89053091305508 -2.93850454565021 0.01391011708963  
C -2.52411986688914 -3.71303020061756 -4.18525295468252  
C -3.32161462780823 -0.80258036417868 -3.49302792688107  
C -4.22650536444931 0.04496083154219 -2.58555373884023  
H -2.31876836986847 -0.37603172182597 -3.40836025506613  
C -4.21367148763060 1.51093180335225 -3.03283188377446  
H -5.25285992421269 -0.33358076042173 -2.62183993378526  
H -3.87799560063831 -0.01684734113700 -1.55600357689496  
C -4.62982483199461 1.65033882011386 -4.50007107208243  
H -4.87579330255607 2.09933970817582 -2.39003108911334  
H -3.20160341721919 1.90656100134442 -2.89313452387125  
C -3.75063654259695 0.78019402073540 -5.40307237575060  
H -5.67779854583997 1.34113813467802 -4.61171058272851  
H -4.57662454188550 2.69725568512989 -4.81600202851384  
C -3.75159320697248 -0.69161874624510 -4.95986186816517  
H -4.08035384026401 0.85047170989750 -6.44477658747270  
H -2.72037025882629 1.15796216981501 -5.37161408495180  
H -4.75428055680924 -1.11197634464060 -5.10038044702383

H -3.07093609599325 -1.25364458807226 -5.60239768627081  
C -3.53687320209539 -3.98076547036423 -5.31283004195559  
H -1.65629476011132 -3.19311228469619 -4.60818450936796  
C -2.83978083559511 -4.73892002985351 -6.45591472905157  
H -4.34704261058257 -4.60429623622618 -4.92065612995452  
H -3.99296723185661 -3.07224211500855 -5.69579583014109  
C -2.23487601211566 -6.06314414132837 -5.97181232685527  
H -3.55158733467897 -4.92114401311392 -7.26753771518869  
H -2.04567079375911 -4.10368856206019 -6.86916258239181  
C -1.33329743324777 -5.85685059198499 -4.74917461270770  
H -3.05070208154134 -6.74643565500701 -5.70270745333657  
H -1.67860158619509 -6.54379088557079 -6.78338222240459  
C -2.05476729886840 -5.07238640903184 -3.64702101643933  
H -0.99444346035929 -6.81943885948405 -4.35606837526786  
H -0.42960123822792 -5.30755214648312 -5.03962396317449  
H -2.92811355494476 -5.64133556854642 -3.30793545355443  
H -1.41798175591036 -4.95638785757957 -2.78057836744810  
C 0.13848248588218 -2.59446596485200 -2.19184722291845  
C 0.58821617140041 -1.54889903672772 -3.12029471839784  
C 1.55270509419232 -2.02266716149806 -3.95603573064387  
C 1.77246447672316 -3.45724868427135 -3.64973924529264  
C 0.93801209074812 -3.80472777271260 -2.55803550625502  
C 2.55361928058229 -4.41071040578369 -4.27956208525482  
C 2.28310168923691 -1.23824272296385 -4.95202130572041  
H 0.23589353967579 -0.53245922100846 -3.07121102743960  
C 3.65260039016118 -1.45074331283482 -5.17929202247110  
C 4.34948901996340 -0.66937707247304 -6.09505369195793  
C 3.69228249659193 0.33243446509563 -6.80650200141797  
C 2.33272253353941 0.55494350445943 -6.58889222038137  
C 1.63541656429506 -0.22029236356343 -5.67080154620027  
H 4.17446564089927 -2.20836194241804 -4.60940721494544  
H 5.40870873048232 -0.84077945768693 -6.25167374542455  
H 4.23499821211823 0.93636288762585 -7.52475601964165  
H 1.81503259654024 1.33201953555457 -7.13987048078124  
H 0.57626509212702 -0.05553620640188 -5.51153692493120  
C 2.54589725197463 -5.72450698637387 -3.78488275235157  
H 3.15312726702949 -4.15884227850385 -5.14572211112037  
H 3.15308286596548 -6.48164876576459 -4.26843086560218  
C 1.76287122645948 -6.05851020526993 -2.68872385969317  
C 0.9471360000658 -5.09916635111356 -2.07090066652761  
H 1.76652979350743 -7.07439782309727 -2.31073371994241  
H 0.31473535698479 -5.37085488531237 -1.23907526268836  
C 2.73867171668354 -1.65720540094325 -0.43616092815739  
C 3.80942432893471 -2.10077436062262 -1.21361623392318  
C 4.25005514332823 -3.42237263641846 -1.17440590636350  
C 3.59222598079490 -4.31929834391516 -0.33144307613528  
C 2.49997398871076 -3.93147166610207 0.44050854863648  
C 2.32710601507851 -0.21045278962088 -0.45418558741961  
H 4.30955026657151 -1.39048245653263 -1.86419704060762  
C 5.39017009347557 -3.88677343668978 -2.04272723887955  
H 3.91492911439105 -5.35470198361904 -0.30024652148407  
C 1.76449982696282 -4.93081992535490 1.29424538757826

H 2.84952853180668 0.32350999298122 -1.24914028913910  
H 1.25459406960693 -0.08560127650917 -0.60714737272746  
H 2.58027124656332 0.27858522306918 0.49419878810200  
H 5.94103428189375 -3.04152087517900 -2.46031039554460  
H 5.01302767938455 -4.48964721723762 -2.87417167145433  
H 6.09325126053306 -4.50632824952635 -1.47899954808383  
H 0.68856708759788 -4.89515614609635 1.10735253964021  
H 2.11572186543204 -5.94242163721968 1.08337986524625  
H 1.92268590706247 -4.74666780235495 2.36291938335567  
C -3.33083247161396 -2.01376917143832 2.65683538308089  
C -3.14909439540590 -3.39430062974478 2.76757733119017  
C -4.08928966761433 -4.17552654417674 3.42747205517172  
C -5.20580917305519 -3.55940832288092 3.97973817813355  
C -5.40851069681308 -2.18677823983420 3.89126528923878  
C -4.46020871884112 -1.41950356508305 3.22814772660786  
H -2.29816283952757 -3.86453876030903 2.29202871291040  
H -3.97878974213639 -5.24792346574028 3.50482511414124  
N -6.21551195318526 -4.38605108126651 4.66988227634702  
H -6.29123862185163 -1.74996275911082 4.33611118926156  
H -2.68855241848363 -1.12619173302009 0.81077402605891  
H -2.41802229052254 -0.12207804515335 2.19879745334497  
H -4.60238611888183 -0.34682209848465 3.14695474543077  
O -6.01050389144449 -5.59018515530032 4.74293411237031  
O -7.19912952135838 -3.81635503923658 5.12626145349796

**14b(4)**

125

Coordinates from ORCA-job

C 0.01778101565181 1.02705535140963 0.59588047774334  
N 1.22003509729328 0.84357633808305 1.15718397469343  
C 1.41039693789367 1.68910880951144 2.35586442163480  
C -0.01204241662211 2.19262733949641 2.63027342206015  
N -0.68058338782440 1.88878432249318 1.35899147417747  
C 2.27850666809254 0.00281661931231 0.68730578273763  
H 2.10196485628802 2.50459543774562 2.12485163462087  
H 1.82416826620014 1.10225111911670 3.17631732659463  
H -0.05262873049500 3.26060321553563 2.84727934553664  
H -0.49779945244918 1.64621448081117 3.44727508487237  
C -2.08132843616331 2.19723795792197 1.15071945444321  
Ru -0.86619679465525 0.30432398498982 -1.10483473597764  
Cl -2.01715010582368 -1.35371314489230 0.37893530359629  
Cl -0.24108564434398 2.53030336187838 -2.09880798681198  
P -2.48052004248729 -0.19379922618578 -3.00193225311416  
C -4.26822139169462 -0.45671148670496 -2.39977933770868  
C -5.34742612866725 -0.44914429144092 -3.49265139479589  
H -4.20859126110380 -1.46228004470176 -1.97192229286219  
C -6.71668100805660 -0.81928070623566 -2.90250808481932  
H -5.41009671268956 0.54646546847755 -3.94126764661559  
H -5.09438326623068 -1.13790797930840 -4.29869461370123  
C -7.10002226660028 0.10799443381181 -1.74488930397334  
H -7.47926523177786 -0.78700689401670 -3.68757211203058

H -6.68118586491400 -1.85466925599583 -2.53974030383771  
C -6.01267892130792 0.12244464084552 -0.66507073328199  
H -7.24076746247647 1.12588899058472 -2.13087990446049  
H -8.05898571271433 -0.19922469785200 -1.31581685671912  
C -4.64081539049876 0.48747453374352 -1.24616133893761  
H -6.27600611910076 0.82649961980626 0.13114005037706  
H -5.94589408317397 -0.86833216161355 -0.19950430369610  
H -4.65856562477215 1.52399755049992 -1.59451527071519  
H -3.88775564892101 0.40488694506033 -0.46195622253384  
C -2.00354903396463 -1.83825615182141 -3.86416227637979  
C -2.41789068830845 1.25493494592645 -4.24586707749811  
C -3.19378878222364 2.46274580930835 -3.69327560948126  
H -1.35901286400289 1.51996613703508 -4.19658038924769  
C -2.92613659486433 3.71358267129762 -4.53638117290622  
H -4.26803298753940 2.25199527152391 -3.70277931918914  
H -2.89696928547494 2.65179528438445 -2.66200327459071  
C -3.28101458277833 3.47298633441488 -6.00667886349596  
H -3.49967657946825 4.55631765854906 -4.13712737183378  
H -1.86729637844422 3.97795208125751 -4.44460181014949  
C -2.52593629658839 2.25937558367368 -6.55608460190996  
H -4.36194146137956 3.29802969434080 -6.09395186696770  
H -3.05739593841667 4.36074349824669 -6.60690436041163  
C -2.76659173667364 0.99433945487979 -5.71520990882033  
H -2.80904856049387 2.06735504012433 -7.59628552942771  
H -1.45100555170487 2.48105173643230 -6.55641772510224  
H -3.80988484698354 0.67593362122786 -5.81705759653523  
H -2.14208221623587 0.19281892875962 -6.11131716548587  
C -2.77545926381199 -2.31431226555940 -5.10761502748437  
H -0.96438757158876 -1.64308608478527 -4.15312521562495  
C -2.07556756904988 -3.54511382670222 -5.70987828282441  
H -3.79084605300682 -2.59842032894279 -4.81485571865765  
H -2.86892834908344 -1.54169266754683 -5.86655333537414  
C -1.97111753044459 -4.69044875487941 -4.69704171838235  
H -2.61480908136448 -3.87410916336367 -6.60417757549152  
H -1.06922441047111 -3.25480290142277 -6.03754261171906  
C -1.31608045121197 -4.22077398270855 -3.39377153189399  
H -2.97979283971083 -5.06361932431844 -4.47775405552502  
H -1.41277581175607 -5.52816048568843 -5.12716052069801  
C -2.01621127560182 -2.97765752264806 -2.83197671307462  
H -1.33003241056450 -5.02032968044910 -2.64699108994600  
H -0.26113191286521 -3.98399472018330 -3.57190915938042  
H -3.05787094271404 -3.22727028215235 -2.59643864267954  
H -1.55989671474992 -2.67200694352701 -1.89751967360886  
C 0.51899248238009 -0.65078073428320 -1.90767790747430  
C 1.30020605047698 -0.15072088962121 -3.04572263109258  
C 2.20081391762886 -1.08275154618031 -3.46363681071422  
C 2.03362428379814 -2.29979033551849 -2.63030140884850  
C 1.02917274410917 -2.03470378792409 -1.66697887495498  
C 2.62101990616509 -3.55088621186337 -2.71633368635937  
C 3.19260632801352 -0.89504419234372 -4.52234782227920  
H 1.20496109065080 0.85307170276468 -3.42458688438778  
C 4.48245997097244 -1.44035428333672 -4.41693618809741

C 5.43348705636576 -1.20914893118311 -5.40556000319944  
C 5.11318843266793 -0.43931488534096 -6.52198665204039  
C 3.83471684998515 0.10580377638568 -6.64010060178125  
C 2.88542348168352 -0.11731317796713 -5.65089408875675  
H 4.74719670006289 -2.01558598773224 -3.54010948430506  
H 6.42821175778277 -1.62775590477620 -5.30218550993002  
H 5.85345798909982 -0.26372589509234 -7.29425601475644  
H 3.57752514979271 0.70291367503089 -7.50768187899304  
H 1.88932925349651 0.29774281064773 -5.74827260624364  
C 2.23797555358444 -4.54079659309526 -1.79761375807894  
H 3.35274898809412 -3.77428034582620 -3.48279313542823  
H 2.69040326033383 -5.52462272075281 -1.85327439996153  
C 1.27819154654507 -4.27221445553989 -0.83031310075672  
C 0.65949914702048 -3.01558907937509 -0.76435894781723  
H 0.98783253423880 -5.04503571062364 -0.12770667816240  
H -0.11138206748401 -2.81667905552226 -0.03465229862008  
C 3.17918270634372 0.48096552093480 -0.27082297254708  
C 4.20026450840981 -0.37500601273884 -0.68889429473784  
C 4.35045870772577 -1.65515272972107 -0.16068082501682  
C 3.45359604649334 -2.08282320495676 0.82050409450403  
C 2.40832409104891 -1.27328868453864 1.25421849642597  
C 3.06729078746497 1.87177619262237 -0.83185734466129  
H 4.89044035964953 -0.02805028296622 -1.45063023268250  
C 5.44516790154896 -2.57203449450162 -0.64147203267193  
H 3.54817546192319 -3.08250397857498 1.23081986922963  
C 1.41686452189555 -1.76599397941492 2.27482980488402  
H 3.75161016899198 1.99847741856271 -1.67223669286035  
H 2.05813554884937 2.09528940501971 -1.17766023436448  
H 3.32818912986976 2.61998218292564 -0.07497175242236  
H 5.01962041801598 -3.46974478027049 -1.09982062432865  
H 6.08061370027406 -2.07863258931702 -1.38001958001604  
H 6.08199344819396 -2.89839248264595 0.18612341027897  
H 1.51360061930122 -1.22557109924162 3.22283202746497  
H 0.38937942159395 -1.63196056818216 1.92892762726612  
H 1.57613773307230 -2.82507577854257 2.48164015038375  
C -2.36812511510053 3.67659676458473 1.25709747002535  
C -3.39697671009118 4.14087923015173 2.07797159908829  
C -3.68169291490685 5.49996645020253 2.15756870791313  
C -2.91536894338475 6.38125315517964 1.40647323450904  
C -1.88385450964990 5.94551402631249 0.57993769830831  
C -1.61262273791696 4.58636546646128 0.50811383285475  
H -3.98151785864737 3.43606061248437 2.65912384542013  
H -4.47347196040814 5.88470742819140 2.78488869540860  
N -3.20763108632266 7.82764638722231 1.48768431806455  
H -1.32140250754114 6.66798285943530 0.00586282635672  
H -2.70495274056369 1.62541244280599 1.84668460219267  
H -2.35222487148410 1.86714092974082 0.14419522740861  
H -0.83389570237906 4.21395604891395 -0.14784783419720  
O -2.51229512963855 8.58461940259242 0.82369713506627  
O -4.12758406241069 8.18077220346752 2.21416485579463

**14b(5)**

125

Coordinates from ORCA-job

C -1.10843731084181 0.37628375332760 1.09475989232499  
N -0.44645981239523 -0.57897086964232 1.78149141273893  
C -0.12575721244937 -0.19513938395392 3.16941591402053  
C -0.73051767102653 1.21114406269201 3.26443801097560  
N -1.26739974882964 1.42759670696945 1.91059233985787  
C 0.12551954324139 -1.77420420525665 1.24130459363225  
H 0.95680096964845 -0.20961980677885 3.32250236003733  
H -0.58135905044002 -0.89672123378641 3.87001999621996  
H 0.01055103354682 1.97765500023149 3.50723653461976  
H -1.54101641516721 1.27004289122638 3.99568164101724  
C -1.71068558654934 2.75263519169975 1.52883094988011  
Ru -1.90336785700754 -0.08337425586016 -0.82284423266474  
Cl -3.94393955187801 -0.71249474948031 0.60339620372224  
Cl -2.70425022815188 2.14591274700810 -1.40451016843707  
P -3.10665113770136 -0.99264380991545 -2.83591639032223  
C -4.99688192239917 -0.73909606877454 -2.96172345834551  
C -5.58327465792722 -0.92659850040075 -4.36965281531083  
H -5.37209942163572 -1.53390361879625 -2.30631212845607  
C -7.11720185351260 -0.87723187617096 -4.33239745193208  
H -5.22064685090933 -0.11985912463057 -5.01482936456704  
H -5.25849724925486 -1.86214015392982 -4.82253141685370  
C -7.61882454771082 0.43093830561851 -3.71277835436237  
H -7.51446107958713 -1.00185094734176 -5.34539609655026  
H -7.48840579845733 -1.72557802221288 -3.74256089721225  
C -6.99886141300291 0.65276176651270 -2.33005204405974  
H -7.34092870836334 1.26539509655375 -4.37044388555520  
H -8.71196727635360 0.42819205078077 -3.65060520143231  
C -5.46700851480020 0.59499970543717 -2.36797552875909  
H -7.31610449446862 1.61692855214257 -1.91994648443440  
H -7.36540461493021 -0.11626028441053 -1.63811423052654  
H -5.07848041313746 1.42331559707535 -2.96844170568751  
H -5.06601748620340 0.71821810031420 -1.36552193912234  
C -2.85956736754803 -2.89298734125078 -2.79615527507366  
C -2.22093303406522 -0.46626781605641 -4.44295993381274  
C -2.39801076214505 1.02648419410133 -4.74771512053347  
H -1.18201520659523 -0.61165825109286 -4.13729306538404  
C -1.41205370111910 1.46444608164653 -5.83787555775540  
H -3.42418788774974 1.21280545735193 -5.08581152640825  
H -2.25308680378518 1.61672457856912 -3.84394793683067  
C -1.54839042289432 0.60863141877298 -7.10220817283428  
H -1.56524956794141 2.52215952293801 -6.07501477525646  
H -0.39088823530383 1.37811613533105 -5.44628613959302  
C -1.41925731396136 -0.88483296068022 -6.78061104810794  
H -2.53058666719837 0.79211611565517 -7.55756515237900  
H -0.79846208505160 0.90173503019031 -7.84381356895559  
C -2.42267007153206 -1.32063790989711 -5.70035963002046  
H -1.56162539451908 -1.48461005217850 -7.68540394627144  
H -0.40292465796483 -1.09088128685241 -6.42028120656640  
H -3.44053893765826 -1.20686995113508 -6.08350576475091

H -2.27334738169850 -2.37968006259045 -5.47926766147760  
C -3.89301168338890 -3.73840082770643 -3.55430025358123  
H -1.88877585162991 -3.02790363916023 -3.28562733953698  
C -3.54821353431888 -5.23197225787210 -3.47803649566609  
H -4.88545727787570 -3.58024500405933 -3.11950365682339  
H -3.95000237653788 -3.43515220742070 -4.59983266352060  
C -3.43321622662869 -5.70594629667954 -2.02741477842064  
H -4.30517372972076 -5.81305695143006 -4.01397888665007  
H -2.59429167556166 -5.40636670473252 -3.99377618292056  
C -2.41260721642234 -4.86220948466434 -1.25821120301191  
H -4.41277768786390 -5.61604358341744 -1.54024125675664  
H -3.15829598311234 -6.76491153671700 -1.99102033829597  
C -2.74143205515937 -3.36888121205191 -1.34191458346643  
H -2.37790735833125 -5.17234305782566 -0.21064595334089  
H -1.41062014010665 -5.03851635184703 -1.67143358083779  
H -3.66800994659175 -3.15291277579664 -0.80303771615886  
H -1.97121248554974 -2.79501008061215 -0.81471838368869  
C -0.31176345377066 0.22697816983033 -1.81609911414860  
C 0.25351743268773 1.51280796783848 -2.21154108551162  
C 1.33313988938406 1.35909113082399 -3.03164111467873  
C 1.55457491335083 -0.09645186972319 -3.23453517636894  
C 0.57994118160481 -0.78316410152859 -2.46675491585353  
C 2.43108958040632 -0.79356199201949 -4.04720951545255  
C 2.11769676054818 2.44878962608257 -3.60604232818223  
H -0.14984508018168 2.45509443712461 -1.88547024067659  
C 3.51077535341923 2.35433573564964 -3.75008823770024  
C 4.24605071959245 3.43410902847667 -4.22608604604601  
C 3.60398589824398 4.61719898693406 -4.58426941803288  
C 2.21847518455387 4.71637561321209 -4.46779701041326  
C 1.48228609035608 3.64681674896751 -3.97643228319029  
H 4.01926429329632 1.44909476774375 -3.44214491494385  
H 5.32475141567888 3.35830270666288 -4.30296683174975  
H 4.17940534885030 5.46368616040756 -4.93896667446402  
H 1.71699913945626 5.63801726513425 -4.73592679472265  
H 0.40513522822784 3.72232624646414 -3.88512194746931  
C 2.36406572465462 -2.19904712522585 -4.06343273411668  
H 3.14460287139478 -0.27590516086187 -4.67678454337910  
H 3.04562887323131 -2.75717097663339 -4.69567917533332  
C 1.43609949928547 -2.87549290132073 -3.28230537487447  
C 0.53288772373931 -2.16412511600667 -2.47584231996901  
H 1.40155495882192 -3.95912028401830 -3.29770997096395  
H -0.17928143856081 -2.69889551046290 -1.86494479353212  
C 1.39254532901151 -1.69476663431741 0.63569654846784  
C 1.99194625837492 -2.87072672396657 0.19683691147028  
C 1.37217992743640 -4.11219642542696 0.35533826993165  
C 0.13437469879103 -4.16024091429495 0.99203159897436  
C -0.50567152685076 -3.00744687115503 1.45729108204533  
C 2.09391534638551 -0.37447002459191 0.46402885612156  
H 2.95586914287920 -2.81425419038972 -0.29717180403746  
C 2.03274187556429 -5.36379123901661 -0.16293664373971  
H -0.34788109786890 -5.11944101047038 1.14200675944810  
C -1.81311998495270 -3.09908263178182 2.19537126246442



H 3.00598458237344 -0.49882935236471 -0.12000017874019  
H 1.46175705275199 0.34892687088392 -0.04975389661680  
H 2.37008596219732 0.05847547090324 1.43163401734396  
H 1.44021477947602 -6.25111175103073 0.06662483837400  
H 2.16182368794396 -5.31317941094763 -1.24853506252931  
H 3.02690069891068 -5.49617170326908 0.27335949607536  
H -2.54810964177305 -2.38591220022714 1.81434522656738  
H -2.22727211563799 -4.10598053675042 2.11626634932721  
H -1.67305372456207 -2.88731753139801 3.26105681306444  
C -0.64630977745243 3.54944488863981 0.79581501923952  
C -1.02269529678764 4.69236959849041 0.08146581970293  
C -0.08942181756388 5.42132293609646 -0.64012775835391  
C 1.23642851437344 4.99608727429330 -0.64370376664052  
C 1.64197937992251 3.86962532428232 0.05755817147946  
C 0.69211475488104 3.15371263537486 0.77591022443523  
H -2.06457761775813 4.98828747004786 0.06014703638606  
H -0.36812665029323 6.29575138384689 -1.21042012046138  
N 2.23479858948478 5.75630110518519 -1.41317457050551  
H 2.67713100239108 3.56192658087998 0.01657727342879  
H -2.00496415082586 3.27733051760931 2.44305321338362  
H -2.59096723949817 2.66682015945875 0.89562455861411  
H 0.99959561607418 2.25673036047026 1.29344609526286  
O 3.40019980039617 5.38638141062544 -1.35912397701006  
O 1.84058260012005 6.71615206368240 -2.06574240096731

**14b(6)**

125

Coordinates from ORCA-job

C -0.10837035798926 -0.50513652843136 1.52669106573760  
N 0.97213059589011 0.29326422714867 1.71515428542224  
C 1.41062259303426 0.36461562511346 3.12405365906210  
C 0.36326669487827 -0.47970487119968 3.84522446563828  
N -0.44233224944749 -1.00643349699084 2.73331456016433  
C 1.91198608640441 0.78533233959342 0.75269855907553  
H 1.42561691342382 1.40347620568657 3.45699259461851  
H 2.42277212610943 -0.03782427793587 3.21864446820934  
H -0.26943031847028 0.11165518393473 4.51356011891676  
H 0.79905117220169 -1.29950834860587 4.42277373116908  
C -1.42287792442901 -2.04379951681284 3.01871937374548  
Ru -1.19627742457654 -0.68863836057822 -0.33394227786613  
Cl -3.50153063518052 -1.24297397710548 0.77470414426026  
Cl -1.30831685846433 1.71694843289872 -0.43595740777274  
P -2.64956096074480 -0.76160102896496 -2.42370505994221  
C -4.49437704183288 -0.32515130936949 -2.21923819332214  
C -5.33915516228066 -0.28562037426044 -3.50478332249589  
H -4.84263676919410 -1.15008145401245 -1.59092974413376  
C -6.82615088030815 -0.12314336716001 -3.15019284600182  
H -5.03102811364938 0.55788970418510 -4.13051159196094  
H -5.20648896709246 -1.18470796098213 -4.10234827909462  
C -7.07282928892041 1.12522615216596 -2.29557937429631  
H -7.42143706153248 -0.08404005518021 -4.06821178794668

H -7.15808004193816 -1.01098403515529 -2.59636328547174  
C -6.18046174768605 1.12837558470923 -1.04965920124587  
H -6.85353404724344 2.01775303255242 -2.89685199135919  
H -8.12930980508476 1.18781823065834 -2.01443394293543  
C -4.69997357732466 0.96955485450716 -1.41305165671969  
H -6.32216702698778 2.05466382450859 -0.48320350609087  
H -6.47017884418591 0.30587648109086 -0.38470127215282  
H -4.37890423146355 1.83068482824765 -2.00548852915038  
H -4.09225364441742 0.95435552074651 -0.51306833581168  
C -2.53923202598842 -2.58729173753781 -2.98477698380823  
C -1.94926126325638 0.24740154081712 -3.89040532645715  
C -2.37645899041481 1.72254592383521 -3.83873085364869  
H -0.87821074625932 0.21233673607039 -3.68284286607361  
C -1.61672732165445 2.55315503709062 -4.87956033755543  
H -3.44771155786365 1.80075768543643 -4.04329015682471  
H -2.20495471869448 2.12356486973247 -2.83958954353678  
C -1.75891802619676 1.97041607422626 -6.28922681430812  
H -1.97404381249712 3.58745266863807 -4.85559264097701  
H -0.55737077097102 2.58600202187039 -4.60236832935157  
C -1.35616827856860 0.49241337000557 -6.32264943568964  
H -2.80477522507735 2.06349117509786 -6.60998236311189  
H -1.15913452364074 2.54288318057546 -7.00363167792183  
C -2.14561462866552 -0.33416448615753 -5.29552419294088  
H -1.50838705767638 0.07910200487717 -7.32555191388177  
H -0.28515202881407 0.40223067987478 -6.10407082111690  
H -3.20716273796115 -0.32867904869312 -5.56509648470573  
H -1.80591492266571 -1.37134677548328 -5.33645009473233  
C -3.58200620467231 -3.10815681386641 -3.98455838342276  
H -1.55000150861493 -2.62087780607502 -3.45887411116347  
C -3.23494275125507 -4.53322346574297 -4.43797787624411  
H -4.56279971872108 -3.12098450711250 -3.49730487281889  
H -3.66662885473018 -2.45604136031957 -4.85236656557061  
C -3.13319459729166 -5.48673724190785 -3.24450633340593  
H -3.98666229267008 -4.88900066060042 -5.15024732910523  
H -2.27595735670448 -4.51495238804699 -4.97115492278364  
C -2.14819473169381 -4.95291036918264 -2.19961317126452  
H -4.12412354902307 -5.59439438447332 -2.78507900329332  
H -2.82925464175186 -6.48505641689800 -3.57299301499524  
C -2.50067356873985 -3.52493785092456 -1.76820400097811  
H -2.12358223976892 -5.61916297240275 -1.33554764988475  
H -1.13728291144834 -4.95228783082925 -2.62379491976781  
H -3.46556352228757 -3.49981497042816 -1.25284934663901  
H -1.77639181951088 -3.16925089288114 -1.03018980878267  
C 0.32178380191112 -0.76536946147787 -1.45249810204184  
C 0.95073868345473 0.24118069556138 -2.30536617541640  
C 1.89100087050383 -0.31669928345352 -3.12454019561567  
C 1.92433770298387 -1.78236130996966 -2.86295858699003  
C 1.00904980602285 -2.04214326289978 -1.81521147234816  
C 2.62225472548346 -2.82723191034468 -3.44904169686606  
C 2.75127080105887 0.40432716179066 -4.06109416731589  
H 0.72790474464373 1.29225764185688 -2.21842056787691  
C 4.04260758822334 -0.04815004882609 -4.37833482445568

C 4.85646848926091 0.66973543269586 -5.24790124599672  
C 4.40127344978425 1.85411835035889 -5.82193709726530  
C 3.12544331656165 2.32326234574814 -5.50784198519991  
C 2.31325652134518 1.60786934845240 -4.63840700891750  
H 4.42583649357707 -0.94240287885405 -3.90812653152391  
H 5.85374514057685 0.30790582341889 -5.47028763329062  
H 5.03507082157450 2.40970971691114 -6.50359441444434  
H 2.76217498231493 3.24621318666734 -5.94510269772841  
H 1.32329664406529 1.97220509053381 -4.40270679487538  
C 2.45640212771278 -4.12734328526554 -2.93992669943077  
H 3.27873846434462 -2.66500843711258 -4.29427216841869  
H 3.00707745706809 -4.94707084290436 -3.38668314608378  
C 1.60332587323472 -4.37344192242954 -1.87102466510638  
C 0.86247833490451 -3.32206589931699 -1.31235758944773  
H 1.50569151425003 -5.37592798603984 -1.47094630006745  
H 0.19690440319200 -3.51641636129208 -0.48361051165069  
C 1.96227947182474 2.15581932254974 0.46213922528995  
C 2.93759713598529 2.60087696065005 -0.43062297186799  
C 3.88612324068898 1.74109910804209 -0.98325672305467  
C 3.85827320956622 0.39910466211748 -0.60651626408237  
C 2.89240050533783 -0.09600894761717 0.26794180268030  
C 1.07516010703327 3.15634891375240 1.15448762557168  
H 2.96757474065644 3.65703334935629 -0.68225212481896  
C 4.91920621599971 2.26543630069227 -1.94644204354521  
H 4.60347889899984 -0.28160799424139 -1.00485502630369  
C 2.95048936952655 -1.53308649281212 0.71876842360113  
H 0.74392481715971 3.92653083475279 0.45653051779148  
H 0.18566218714915 2.69193199675085 1.57014584461616  
H 1.63555736594337 3.65193658979087 1.95677836117552  
H 5.44216813425437 3.13011446270527 -1.52703811551849  
H 4.45298339281435 2.58402563729255 -2.88248172320694  
H 5.65883354085378 1.50265347139903 -2.19164622175200  
H 1.96350711426828 -1.98573437353268 0.76788004322249  
H 3.55336528632764 -2.12985257062821 0.03434325769910  
H 3.40729033314150 -1.60499521578318 1.71397152014164  
C -1.08026391693023 -3.37192667647770 2.38366968231274  
C 0.24394774376617 -3.81362559477022 2.28634661740593  
C 0.54761380174431 -5.02774098243775 1.68738853787303  
C -0.49670805342035 -5.80439723963203 1.19634456526132  
C -1.82493527773950 -5.41043527649250 1.31422592578217  
C -2.10958398683406 -4.18357761454092 1.89805625468478  
H 1.04919179354113 -3.19223226997081 2.65609499425596  
H 1.56618206163729 -5.37097813304941 1.57471170680678  
N -0.18368066617271 -7.05427091755337 0.48546531013050  
H -2.60619314561862 -6.04680044450950 0.92495331785697  
H -2.40985787618506 -1.72503892020936 2.69063284701347  
H -1.44668211018956 -2.16222852224600 4.10597288511854  
H -3.12842210818517 -3.82168905081119 1.93435473510159  
O 0.99744765244592 -7.30299471800203 0.26284436207824  
O -1.11872803319127 -7.76560381192968 0.14202785556677
